1 **SARS-CoV-2 and SARS-CoV spike-mediated cell-cell fusion differ in the requirements for**  
2 **receptor expression and proteolytic activation**

3

4 RUNNING TITLE: SARS-CoV-2 and SARS-CoV cell-cell fusion

5

6 Bojan F. Hörnich<sup>1</sup>, Anna K. Großkopf<sup>1</sup>, Sarah Schlagowski<sup>1</sup>, Matthias Tenbusch<sup>2</sup>, Hannah Kleine-  
7 Weber<sup>3</sup>, Frank Neipel<sup>2</sup>, Christiane Stahl-Hennig<sup>4</sup>, Alexander S. Hahn<sup>1</sup>

8

9 <sup>1</sup>Nachwuchsgruppe Herpesviren, Abteilung Infektionsbiologie, Deutsches Primatenzentrum –  
10 Leibniz-Institut für Primatenforschung, Göttingen, Germany

11 <sup>2</sup>Virologisches Institut, Universitätsklinikum Erlangen, Erlangen, Germany

12 <sup>3</sup>Abteilung Infektionsbiologie, Deutsches Primatenzentrum – Leibniz-Institut für  
13 Primatenforschung, Göttingen, Germany

14 <sup>4</sup>Abteilung Infektionsmodelle, Deutsches Primatenzentrum – Leibniz-Institut für  
15 Primatenforschung, Göttingen, Germany

16

17 Correspondence to: ahahn@dpz.eu

18

19

20 **ABSTRACT**

21 The severe acute respiratory syndrome-related coronavirus 2 (SARS-CoV-2) infects cells through  
22 interaction of its spike protein (SARS2-S) with Angiotensin-converting enzyme 2 (ACE2) and  
23 activation by proteases, in particular transmembrane protease serine 2 (TMPRSS2). Viruses can

24 also spread through fusion of infected with uninfected cells. We compared the requirements of  
25 ACE2 expression, proteolytic activation, and the sensitivity to inhibitors for SARS2-S-mediated  
26 and SARS-CoV-S(SARS1-S)-mediated cell-cell fusion. SARS2-S-driven fusion was moderately  
27 increased by TMPRSS2 and strongly by ACE2, while SARS1-S-driven fusion was strongly  
28 increased by TMPRSS2 and less so by ACE2 expression. In contrast to SARS1-S, SARS2-S-  
29 mediated cell-cell fusion was efficiently activated by Batimastat-sensitive metalloproteases.  
30 Mutation of the S1/S2 proteolytic cleavage site reduced effector-target-cell fusion when ACE2  
31 or TMPRSS2 were limiting and rendered SARS2-S-driven cell-cell fusion more dependent on  
32 TMPRSS2. When both ACE2 and TMPRSS2 were abundant, initial target-effector-cell fusion was  
33 unaltered compared to wt SARS2-S, but syncytia remained smaller. Mutation of the S2' site  
34 specifically abrogated activation by TMPRSS2 for both cell-cell fusion and SARS2-S-driven  
35 pseudoparticle entry but still allowed for activation by metalloproteases for cell-cell fusion and  
36 by cathepsins for particle entry. Finally, we found that the TMPRSS2 inhibitor Bromhexine was  
37 unable to reduce TMPRSS2-activated cell-cell fusion by SARS1-S and SARS2-S as opposed to the  
38 inhibitor Camostat. Paradoxically, Bromhexine enhanced cell-cell fusion in the presence of  
39 TMPRSS2, while its metabolite Ambroxol exhibited inhibitory activity in some conditions. On  
40 Calu-3 lung cells, Ambroxol weakly inhibited SARS2-S-driven lentiviral pseudoparticle entry, and  
41 both substances exhibited a dose-dependent trend towards weak inhibition of authentic SARS-  
42 CoV-2.

43

#### 44 **IMPORTANCE**

45 Cell-cell fusion allows the virus to infect neighboring cells without the need to produce free  
46 virus and contributes to tissue damage by creating virus-infected syncytia. Our results

47 demonstrate that the S2' cleavage site is essential for activation by TMPRSS2 and unravel  
48 important differences between SARS-CoV and SARS-CoV-2, among those greater dependence of  
49 SARS-CoV-2 on ACE2 expression and activation by metalloproteases for cell-cell fusion.  
50 Bromhexine, reportedly an inhibitor of TMPRSS2, is currently tested in clinical trials against  
51 coronavirus disease 2019. Our results indicate that Bromhexine enhances fusion in some  
52 conditions. We therefore caution against use of Bromhexine in higher dosage until its effects on  
53 SARS-CoV-2 spike activation are better understood. The related compound Ambroxol, which  
54 similarly to Bromhexine is clinically used as an expectorant, did not exhibit activating effects on  
55 cell-cell fusion. Both compounds exhibited weak inhibitory activity against SARS-CoV-2 infection  
56 at high concentrations, which might be clinically attainable for Ambroxol.

57

## 58 **INTRODUCTION**

59 The coronavirus disease 2019 (COVID-19) disease spectrum is caused by the severe acute  
60 respiratory syndrome-related coronavirus 2 (SARS-CoV-2), which was first identified in patients  
61 with pneumonia of unknown origin in the city of Wuhan, China (1). While first characterized as a  
62 pneumonia, COVID-19 probably affects a number of organ systems (2–4). SARS-CoV-2 was  
63 shown to use the Angiotensin-converting enzyme 2 (ACE2) receptor, which was previously  
64 described as receptor for the closely related severe acute respiratory syndrome-related  
65 coronavirus (SARS-CoV) (5), for the infection of human cells (1, 6, 7). For the proteolytic  
66 activation of the viral spike protein, a prerequisite for fusion activity of coronaviruses (reviewed  
67 in (8)), the transmembrane protease serine 2 (TMPRSS2) (7, 9) as well as the related TMPRSS4  
68 (2) were reported to be of critical importance. In addition, TMPRSS2 was demonstrated to  
69 colocalize with the ACE2 receptor (10) and therefore may be biologically particularly relevant.

70 Depending on the cell type, SARS-CoV-2 spike(SARS2-S)-driven entry can also occur through  
71 endocytotic pathways where virus-cell fusion is most likely activated by cathepsins (7). Another  
72 study reported that several members of the TMPRSS family can activate SARS2-S-mediated  
73 membrane fusion (11). The proposed mechanisms for spike priming and initiation of fusion  
74 therefore require further clarification, e.g. whether serine protease activity is required under all  
75 circumstances, or whether fusion can also occur without the action of serine proteases, where  
76 these proteases act on the spike, and whether there are differences between cell-cell and cell-  
77 particle fusion.

78 It was recently discovered that the polybasic S1/S2 cleavage site of SARS2-S is required for  
79 efficient infection of lung-derived cells and promotes the formation of syncytia (12).  
80 Understanding syncytium formation may be important as large syncytial elements are reported  
81 to constitute a hallmark of COVID-19-associated pathology (13). Nevertheless, the exact  
82 contribution of the two known proteolytic priming sites to cell-cell fusion and their protease  
83 usage are not entirely clear. To address these questions, we mutated the S1/S2 site as well as  
84 the S2' site, we assessed the effects of proteolytic activation by using inhibitors of TMPRSS2 and  
85 other proteases, and we analyzed the effects of different levels of protease and receptor  
86 expression on SARS-CoV spike (SARS1-S) and SARS2-S fusion activity.

87 TMPRSS2, which is expressed in airway cells (14), may be amenable to specific inhibition by  
88 Bromhexine (15), a molecule normally used as an expectorant that thins phlegm and eases  
89 coughing and is widely known as a popular over-the-counter medication, which would make its  
90 repurposing for COVID-19 particularly attractive. For these or additional reasons, Bromhexine is  
91 now being tested in at least three clinical trials for efficacy against COVID-19 (NCT04355026,  
92 NCT04273763, NCT04340349). We therefore tested the effect of the TMPRSS2 inhibitor



93 Bromhexine on spike-mediated cell-cell fusion and SARS2-S driven cell entry and compared its  
94 potency to the serine protease inhibitor Camostat. We also included Ambroxol, an active  
95 metabolite of Bromhexine in our studies (16). Ambroxol has often replaced Bromhexine as an  
96 over-the-counter medication, and the structural similarity to Bromhexine may hint at potential  
97 inhibitory effects towards TMPRSS2. Ambroxol may also exhibit weak but broad anti-viral  
98 activity as it was shown to reduce the occurrence of respiratory infections (17) and to inhibit  
99 proteolytic activation of influenza virus by triggering release of antiviral factors (18), and it is  
100 used to treat acute respiratory distress syndrome in adults and antenatally in infants (19, 20).  
101 Further, two recent preprints, one describing modulation of the ACE2-SARS2-S interaction by  
102 both Bromhexine and Ambroxol (21) and the other reporting weak inhibitory activity of  
103 Ambroxol against SARS-CoV-2 replication (22) in Vero E6 cells, point at a potential utility of  
104 these molecules in the therapy of COVID-19.

105

## 106 **RESULTS**

107 SARS2-S mediates robust fusion of 293T cells transfected with ACE2 with and without co-  
108 expression of TMPRSS2.

109 In order to investigate the fusion mechanism of SARS-CoV-2 we generated several SARS2-S  
110 mutants (Fig. 1 A, schematic drawn after (23)). It was reported that the furin-recognition motif  
111 at the S1/S2 cleavage site of SARS2-S, which is not found in SARS1-S, plays a role in the infection  
112 of airway cells like Calu-3 but is dispensable in other cell types (11, 12). Thus, we generated a  
113 mutant, SARS2-S1/S2-mut, where the furin-recognition motif and the cleavage site were  
114 replaced by alanines (Fig 1 A). In contrast to already published S1/S2 mutants (24, 25) we did  
115 not delete the site as we suspected that this may influence protein conformation and flexibility

116 but we mutated the proposed furin cleavage site (26) to fully abrogate processing at this site.  
117 We furthermore generated an S2' site mutant, SARS2-S2'-AA, by exchanging K814 and R815 to  
118 alanine. The S2' site was shown to be important for proteolytic priming in SARS1-S and is highly  
119 conserved among coronavirus spikes (27). We therefore suspected that this site is also  
120 important for proteolytic processing of SARS2-S. Clearly detectable bands of lower molecular  
121 weight, indicative of proteolytic processing, were only observed with wt SARS2-S (Fig. 1 B). As  
122 expected, the S1/S2-mutant exhibited no processing at the S1/S2 site indicated by a missing S2  
123 fragment in Western Blot from transfected 293T lysate (Fig. 1 B). This is similar to SARS1-S which  
124 has no furin cleavage site at this position. As not all mutants might be efficiently expressed at  
125 the cell surface, we performed cell surface staining with a COVID-19 convalescent serum  
126 followed by flow cytometry (Fig. 1 C, middle column group), which revealed detectable but  
127 strongly reduced cell surface expression of the SARS2-S2'-AA mutant, as well as reduced ACE2  
128 binding when the same assay was performed with an ACE2-Fc fusion protein (Fig. 1 C, right  
129 column group). SARS1-S was only weakly recognized by the COVID-19 convalescent serum. RRV  
130 gH $\Delta$ 21-27-Fc, an Fc fusion protein of RRV gH that lacks any detectable receptor interactions  
131 (28), served as control.

132 In order to study spike-mediated cell-cell fusion, we established a quantitative reporter gene  
133 assay. We chose 293T cells as effector cells, i.e. the cell expressing the viral glycoproteins,  
134 because i) 293T exhibit high transfection efficiency and protein expression and ii) 293T can be  
135 lifted without trypsinization. We resorted to a system that is also used for two-hybrid  
136 screenings, using a VP16-Gal4 transcription factor in one cell and a Gal4 response element-  
137 driven reporter construct in the other cell, which results in strong transactivation and reporter  
138 gene expression after cell-cell fusion. We transfected 293T target cells with ACE2 and TMPRSS2

139 expression plasmids and a Gal4 response element driven TurboGFP-luciferase reporter plasmid  
140 (Gal4-TurboGFP-Luc) and effector cells with spike expression constructs, as well as with a  
141 plasmid encoding the Gal4 DNA binding domain fused to the VP16 transactivator. Apparent  
142 expression levels of SARS1-S as assayed by Western blot were lower than those of SARS2-S (Fig.  
143 1 B), but this may be owed to different glycosylation, proteolytic cleavage and transfer or  
144 detection and was not reflected in its surface expression as measured by ACE2-binding (Fig. 1 C)  
145 and its fusion activity (Fig. 1 D). We found that when only ACE2 was overexpressed (Fig. 1 D,  
146 left), all SARS2-S constructs exhibited fusion activity that was statistically different from  
147 background. SARS1-S had visible activity but that did not remain significant after correction for  
148 multiple comparisons. On 293T cells that were co-transfected with ACE2/TMPRSS2 expression  
149 constructs, all spike variants exhibited fusion activity significantly over background (Fig. 1 D,  
150 right), except for the SARS2-S2'-AA mutant, which exhibited visible but not statistically  
151 significant activity. We chose a logarithmic scale in Fig. 1 D for an initial overview of the  
152 considerably different fusion activities and how they relate to background activity. Testing  
153 activity in a time-lapse experiment, we observed that luciferase activity was increasing up to  
154 18h for SARS1-S and SARS2-S1/S2-mut and possibly 24h for SARS2-S (Fig. 1 E). Also, activity  
155 between SARS1-S, SARS2-S, and SARS2-S1/S2-mut was not meaningfully different at any  
156 timepoint. Activity is shown on a linear scale here, which allows for discrimination of smaller  
157 differences and which we used from here on.

158

159 The S1/S2 site is critical for syncytium size.

160 Our results demonstrated mostly normal fusion activity of the S1/S2 mutant in our system when  
161 TMPRSS2 was present. Therefore, we wanted to address how mutation of the S1/S2 site

162 translates into syncytium formation in our system, as several reports clearly demonstrated that  
163 the S1/S2 site is important for this process (24, 26). It should be noted that initial cell-cell fusion  
164 and syncytium formation may not necessarily be the exact same thing. After the initial fusion  
165 event, all factors that were originally present in separate cells, i.e. viral glycoprotein, receptor,  
166 and activating proteases are then together in a single syncytial cell and can interact directly  
167 upon co-expression. As our reporter also encodes a TurboGFP that is fused to firefly luciferase,  
168 syncytium formation can be conveniently visualized. Under the microscope, we indeed observed  
169 that in the presence of ACE2 and TMPRSS2 the S1/S2 mutant formed small but numerous  
170 syncytia, while wt SARS2-S formed larger syncytia (Fig. 1 F). Luciferase reporter activity was  
171 comparable. Formation of extended syncytia is obviously a quality that our luciferase reporter  
172 does not capture, and interestingly, this is not a matter of the timing of the measurement (Fig. 1  
173 E), as even at earlier time points, the luciferase activity between SARS2-S wt and the S1/S2  
174 mutant as well as SARS1-S were similar. We conclude that our luciferase assay measures  
175 primarily the initial fusion between effector and target cell and not the formation of extended  
176 syncytia.

177  
178 SARS2-S-mediated cell-cell fusion is dependent on ACE2 receptor expression and is less  
179 restricted by TMPRSS2-mediated activation *in trans* than SARS1-S-mediated fusion.

180 As we found SARS2-S capable of fusing 293T cells efficiently when ACE2 was expressed without  
181 TMPRSS2, while SARS1-S was only fully fusogenic in the presence of TMPRSS2, we decided to  
182 analyze SARS2-S, SARS1-S and SARS2-S1/S2-mut as well as the SARS2-S2'-AA mutant in the  
183 context of different ACE2 and TMPRSS2 expression levels (Fig. 2). In this setting, we again  
184 observed robust fusion activity of SARS2-S that was essentially unaltered by different levels of

185 TMPRSS2 but required the presence of ACE2 (Fig. 2 A). SARS1-S on the other hand exhibited  
186 high activity under all conditions with TMPRSS2 present, whether ACE2 was recombinantly  
187 expressed or not. Activity of the SARS2-S2'-AA mutant was low under all conditions but was  
188 highest under the condition with maximal ACE2 expression and not responsive to changes in  
189 TMPRSS2 levels. SARS2-S1/S2-mut exhibited an interesting behavior in that it exhibited reduced  
190 fusion activity when either ACE2 or TMPRSS2 were absent but was fully fusion competent in all  
191 conditions in between, with probably a slight trend towards highest activity with comparatively  
192 low TMPRSS2 levels, similar in that respect to SARS1-S. The respective protein levels as present  
193 at the end of the co-culture are shown in Fig. 2 B. We labelled the fully processed S2 fragment  
194 with an asterisk, as the exact nature of this fragment can't be deduced with full confidence from  
195 its apparent molecular size, even if it could be the so-called S2' fragment after cleavage at this  
196 site. Interestingly, the S0 and S2 fragments of SARS2-S are visibly processed to a large degree  
197 into smaller fragments under conditions that allow for high fusion activity. We decided to  
198 continue with transfecting equal amounts of ACE2 and TMPRSS2 expression plasmids.

199  
200 Differential effect of the TMPRSS2 inhibitors Camostat, Bromhexine, and the Bromhexine  
201 metabolite Ambroxol on SARS1-S- and SARS2-S-mediated fusion.

202 For a comprehensive analysis, we measured fusion with target cells that were co-transfected  
203 with ACE2 and TMPRSS2 expression plasmids, in addition to cells transfected with either ACE2  
204 or TMPRSS2 expression plasmid alone. As fusion effectors, SARS1-S, SARS2-S as well as SARS2-  
205 S1/S2-mut and SARS2-S2'-AA were included. To test the effects of TMPRSS2 inhibition by small  
206 molecules on the activation of wt SARS2-S and the two mutants as well as SARS1-S, we  
207 incubated the different target cells with Bromhexine, reportedly a specific inhibitor of TMPRSS2

208 (15), the chemically related compound Ambroxol, or Camostat, an irreversible inhibitor of  
209 TMPRSS2 and many serine proteases in general (29, 30), at 50  $\mu$ M (Fig. 3 A). We chose this high  
210 concentration, which is most likely outside of any therapeutic range except for Ambroxol, as  
211 overexpression of TMPRSS2 may shift the EC50 considerably upwards.

212 As observed before (Fig. 1 D), in the presence of ACE2 and TMPRSS2, both SARS1-S and SARS2-S  
213 exhibited strong fusion activity, as did SARS2-S1/S2-mut. SARS2-S2'-AA on the other hand was  
214 strongly impaired under these conditions.

215 ACE2 expression alone was sufficient for induction of high fusion activity of SARS2-S but induced  
216 only moderate activity of SARS1-S. Levels of ACE2 expression were higher in single-transfected  
217 cells (Fig. 3 B). This observation is compatible with data from the literature stating that ACE2 is  
218 cleaved by TMPRSS2 (10), which conceivably reduces detection by Western blot, in addition to  
219 potential competition effects between expression plasmids.

220 Nevertheless, SARS2-S-driven fusion was clearly not limited by TMPRSS2 expression, and  
221 reached highest activity when only ACE2 was expressed. The S1/S2 cleavage site mutant of  
222 SARS2-S on the other hand exhibited reduced activation in the presence of ACE2 without  
223 additional TMPRSS2 activity, whereas the SARS-S2'-AA mutant exhibited again low but  
224 detectable fusion activity when ACE2 was overexpressed. Overexpression of TMPRSS2 did not  
225 increase fusion activity of SARS-S2'-AA. Conversely, SARS1-S-driven fusion was clearly more  
226 enhanced by overexpression of TMPRSS2 than by overexpression of ACE2, reaching high activity  
227 under conditions where only TMPRSS2 was recombinantly expressed, and was only weakly  
228 activated by ACE2 expression in the absence of recombinant TMPRSS2 expression (Fig. 2 A, 3 A).

229 We observed that cell-cell fusion by SARS1-S and SARS2-S was not inhibited by Bromhexine, and  
230 only SARS1-S activity was slightly inhibited by Ambroxol in the presence of TMPRSS2.

231 Surprisingly, we observed an induction of SARS2-S fusion activity in the presence of Bromhexine,  
232 significantly so when ACE2 and TMPRSS2 were co-expressed. Camostat did not reduce SARS2-S-  
233 mediated fusion in this setting unless TMPRSS2 was overexpressed without ACE2. However,  
234 both SARS2-S1/S2-mut and even more pronouncedly SARS1-S exhibited a significantly reduced  
235 fusion activity in the presence of Camostat. The strong induction of SARS1-S-mediated fusion by  
236 TMPRSS2 was clearly reversed by Camostat but not by Bromhexine. Notably, Camostat did not  
237 exert any inhibitory effect on the remaining fusion activity of the SARS2-S2'-AA mutant, nor did  
238 TMPRSS2 expression induce activity of this mutant, compatible with the S2' site being the  
239 primary target of TMPRSS2-mediated activation *in trans*.

240 The results were also mirrored by Western blot analysis (Fig. 3 B) of SARS2-S under the same  
241 conditions, if generation of the fully processed S2 fragment is analyzed, which we labelled with  
242 an asterisk. Generation of this fragment was clearly visible under all conditions that allowed for  
243 high fusion activity, e.g. when ACE2 was present, less so with TMPRSS2 alone. Interestingly,  
244 addition of Camostat increased the detectable amount of ACE2, probably explaining the slight  
245 trend towards higher activity in its presence. Further, Ambroxol reproducibly induced the  
246 generation of an atypical TMPRSS2 autoproteolytic fragment, which may hint at some sort of  
247 modulating activity of Ambroxol towards TMPRSS2 (Fig. 3 B, fourth lane).

248 Taken together, we observed robust SARS2-S-mediated cell-cell fusion with ACE2  
249 overexpressing cells that was not dependent on exogenous TMPRSS2 expression and that was  
250 not inhibited by Bromhexine. Instead, fusion was enhanced by Bromhexine. Cell-cell fusion  
251 mediated by SARS2-S was clearly not at all or to a much lesser degree restricted by serine  
252 protease activity on target cells than fusion by SARS1-S. Interestingly, Ambroxol exhibited some  
253 activity against TMPRSS2-mediated activation of SARS1-S.

254

255 Bromhexine enhances SARS2-S-mediated fusion in the presence of TMPRSS2.

256 To further explore the paradoxical effect of the putative TMPRSS2 inhibitor Bromhexine on  
257 fusion activity, we performed fusion reactions in the presence of Bromhexine and Ambroxol at  
258 different concentrations (Fig. 3 C). In order to eliminate potential systematic errors, we deviated  
259 from our previous protocol, co-cultured for 48h instead of 24h, and co-transfected the reporter  
260 plasmid into the effector instead of the target cells, this time using a different luciferase  
261 reporter without TurboGFP. We again did not observe inhibition by Bromhexine, but a dose-  
262 dependent enhancement. Ambroxol treatment on the other hand did not lead to a similar  
263 enhancement, but to a slight decrease in activity at 50 $\mu$ M. As a control fusion protein that  
264 works with practically any cell type, we included VSV-G. While VSV-G is physiologically pH-  
265 activated for full fusion activity (31), it reportedly exhibits considerable activity without pH  
266 priming (32, 33). VSV-G-mediated fusion activity was not increased by Bromhexine.

267

268 SARS2-S-mediated cell-cell fusion is sensitive to inhibition of matrix metalloproteases.

269 The robust cell-cell-fusion that we observed with SARS2-S in the absence of TMPRSS2 activity  
270 should most likely be triggered by proteolytic processing, if the mechanism is analogous to what  
271 was observed for SARS-CoV (8, 34). Therefore, we tested the effects of different protease  
272 inhibitors on SARS2-S-mediated fusion of ACE2 expressing 293T cells without exogenous  
273 TMPRSS2 activity. As we wanted to exclude the possibility that pre-activation on the producer  
274 cells could play a role, we tested the inhibitors both in the co-culture (Fig. 4 A), and with pre-  
275 incubation of both effector and target cells (Fig. 4 B). Values were normalized to the respective  
276 solvent control for better comparison. We observed some inhibitory effect on SARS2-S and



277 SARS1-S fusion activity by the broadband serine protease inhibitor AEBSF, and by a protease  
278 inhibitor cocktail whose main ingredients are the serine protease inhibitors AEBSF and  
279 Aprotinin, and the cysteine protease inhibitors E64 and Leupeptin. The S1/S2 cleavage site  
280 mutant was not sensitive to this inhibitor cocktail, suggestive of action at this site in the SARS-  
281 CoV-2 wildtype spike. These effects were more pronounced and significant with pre-incubation  
282 of the effector cells (Fig. 4B), in particular for the SARS2-S2'-AA mutant. Interestingly, the  
283 inhibitor cocktail almost completely abrogated the remaining fusion activity of SARS1-S. The  
284 furin inhibitor CMK did not significantly inhibit any of the spikes except for the S2' mutant (Fig. 4  
285 A, B). This was somewhat surprising for us, but it may reflect the fact that proteases other than  
286 furin can cleave at the S1/S2 site (35), which may in turn partially obviate furin cleavage in our  
287 system. We also tested EDTA/EGTA, Bromhexine, Ambroxol, and Camostat, which as expected  
288 had no effect in this TMPRSS2-free system. EDTA/EGTA had a mild impact on SARS1-S fusion  
289 activity with and without pre-incubation (Figs. 4 A, B). Bromhexine and Ambroxol exhibited an  
290 interesting behavior in this assay: We observed inhibitory activity of Bromhexine and Ambroxol  
291 towards SARS1-S and the SARS2-S1/S2-mut and SARS2-S2'-AA mutants in this TMPRSS2-free cell  
292 system, suggesting that these substances somehow interact with the spike proteins or ACE2.  
293 Luciferase activity of control cells, which were transfected with both the Gal4-reponse element-  
294 driven reporter and the Gal4 transactivator constructs, was only mildly affected by AEBSF, the  
295 inhibitor cocktail, EDTA/EGTA and Bromhexine, not by the other substances (Fig. 4 C). In  
296 particular, any reductions observed with Ambroxol can't be explained by non-specific effects on  
297 the luciferase reporter system and most likely represent real inhibitory activity against SARS1-S-  
298 mediated fusion activity and fusion mediated by the two SARS2-S cleavage site mutants.

299 Western blot analysis suggested that the protease inhibitor cocktail may have had a somewhat  
300 stabilizing effect on the S2 intermediate form of SARS2-S (Fig. 4 D), which resulted in less  
301 processing into the putative S2' form (marked by an asterisk). CMK both reduced “smear” at  
302 higher molecular weight, which likely represents glycosylation variants, and reduced abundance  
303 of the S2 proteolytic product, that should be generated through cleavage at the polybasic  
304 cleavage site, compatible with furin inhibition. As none of the tested inhibitors resulted in  
305 meaningful reduction of fusion activity of wt SARS2-S that could not also be explained by  
306 toxicity, we decided to test a more potent inhibitor of metalloproteases than EDTA/EGTA,  
307 whose maximum concentration is limited by its effects on cell adhesion and viability. The  
308 EDTA/EGTA concentration that was used by us was most likely too low to meaningfully impact  
309 protease activity, in particular as the cell culture medium contains calcium and magnesium. We  
310 therefore tested Batimastat, which inhibits matrix metalloproteases (36, 37).

311 Batimastat indeed inhibited SARS2-S-dependent fusion in the absence of TMPRSS2 in a dose  
312 dependent manner (Fig. 5 A). Interestingly, no inhibition was observed in the presence of both  
313 ACE2 and TMPRSS2, and in the presence of TMPRSS2 alone unless TMPRSS2 was inhibited by  
314 Camostat (Fig. 5 A). Therefore, Batimastat-sensitive metalloproteases cleave SARS2-S to activate  
315 cell-cell fusion. This notion is supported by the finding that TMPRSS2 expression can overcome  
316 the Batimastat-induced block. Western blot analysis of the fusion reactions indicated that  
317 Batimastat probably induced a subtle change in the migration pattern of the SARS2-S S2  
318 fragment in the presence of ACE2 but without TMPRSS2 (Fig. 5 B). We next decided to test the  
319 effect of Batimastat on the fusion activity of the S1/S2 mutant and the S2'-AA mutant under  
320 conditions of ACE2 overexpression without TMPRSS2 (Fig. 5 C, left). Both mutants were  
321 inhibited by Batimastat, indicating that matrix metalloproteases can cleave irrespective of an

322 intact S1/S2 or S2' cleavage site, although this does not necessarily rule out an modulating  
323 effect in particular by S1/S2 cleavage, as mutation of S1/S2 leads to impaired activity without  
324 TMPRSS2. SARS1-S was also slightly affected by Batimastat under these conditions, but at an  
325 overall very low activity level (compare Fig. 5 A). Under conditions of ACE2 and TMPRSS2 co-  
326 expression, which leads to lower ACE2 levels (compare Figs. 2 B, 3 B, 5 B), SARS2-S1/S2-mut was  
327 not impacted by Batimastat unless TMPRSS2 was again inhibited by addition of Camostat (Fig. 5  
328 C, middle), whereas activity of the S2' mutant was inhibited in the presence of Batimastat alone,  
329 strongly suggesting that TMPRSS2 activates via the S2' site. Under conditions of TMPRSS2  
330 overexpression without ACE2 overexpression (Fig. 5 C, right) Batimastat was again without  
331 effect. Results with the SARS2-S2'-AA mutant come with the caveat that this mutant was barely  
332 active at all under these conditions (Figs. 2 A, 3 A). In summary, these experiments demonstrate  
333 that in the presence of the ACE2 receptor, matrix metalloproteases can efficiently activate  
334 SARS2-S for cell-cell fusion.

335

336 The SARS2-S S2' site is the target site for TMPRSS2-mediated proteolytic activation.

337 While our results with the SARS2-S2'-AA mutant were already strongly suggestive of S2' being  
338 the target site for TMPRSS2, this conclusion remained slightly ambiguous in light of the  
339 relatively low surface expression and inefficient proteolytic processing of this mutant (Fig. 1 B  
340 and C). We therefore set out to generate an S2' mutant that is still efficiently processed and  
341 expressed at the cell surface. We permuted several amino acids to replace the original "KR"  
342 (Fig. 1 A) sequence motif and tested fusion activity in the presence of ACE2, TMPRSS2 and  
343 ACE2/TMPRSS2. We found that SARS2-S2'-GH and -HH mutants were active in our fusion assay,  
344 whereas EE and ES resulted in abrogation of fusion activity, below the levels achieved with the

345 AA mutant (Fig. 6 A). The GH mutant was also processed (Fig. 6 B), efficiently expressed at the  
346 cell surface, and exhibited high ACE2 binding capacity (Fig. 6 C). For further experiments, we  
347 continued with the SARS2-S2'-GH mutant. Interestingly, when we tested the furin inhibitor CMK  
348 for its effects in absence of TMPRSS2, all spike variants were slightly less active, but only the S2'-  
349 GH variant was significantly inhibited, suggesting increased dependence on pre-priming by furin  
350 in absence of the S2' site (Fig. 6 D).

351 Confirming the results of our prior fusion assays with the AA mutant, also the SARS2-S2'-GH and  
352 SARS-S2'-HH fusion activity on 293T cells in the presence of only ACE2 was sensitive to  
353 Batimastat (Fig. 6 E, left), and on 293T cells expressing ACE2/TMPRSS2 both SARS2-S2'-GH and  
354 SARS-S2'-HH were insensitive to Camostat, but again highly sensitive to Batimastat (Fig. 6 E,  
355 right). Fusion activity of the S2 mutants was even increased in the presence of Camostat, likely  
356 because inhibition of TMPRSS2 increases ACE2 levels, as demonstrated in Fig. 3 B. This  
357 unequivocally identifies the S2' site as the TMPRSS2 target site, and interestingly as the only  
358 TMPRSS2 target site, at least for activation of fusion.

359  
360 Entry of SARS2-S-pseudotyped lentiviruses is enhanced by TMPRSS2 and is not inhibited by  
361 Bromhexine

362 To compare our findings on cell-cell fusion to spike protein-driven entry, we used lentiviral  
363 particles expressing GFP as reporter gene, pseudotyped with SARS2-S. We found that TMPRSS2  
364 expression was clearly required for efficient infection of 293T cells by SARS2-S-pseudotyped  
365 particles (Fig. 7 A). ACE2 overexpression alone also enhanced infection, but considerably less  
366 efficiently and barely above the detection limit, which may be owed to our lentiviral GFP  
367 system. The TMPRSS2-mediated enhancement was reduced by addition of Camostat, but not by

368 addition of Bromhexine or Ambroxol, both of which may even slightly enhance infection in this  
369 setting. These observations were corroborated by fluorescence microscopy (Fig. 7 B). As  
370 luciferase is more sensitive than GFP as a reporter gene, we switched to luciferase detection  
371 (Fig. 7 C). We also included the SARS2-S D614G variant. As previously reported, D614G-driven  
372 infection was more efficient (38). It was also strongly enhanced by TMPRSS2, as evidenced by  
373 potent Camostat-mediated inhibition. Ambroxol and Bromhexine had no activity in this system,  
374 as opposed to Camostat. Batimastat did not alter SARS2-S driven entry. A VSV-G pseudotyped  
375 lentivirus was not significantly affected by either substance.

376

#### 377 Mutation of the S2' site uncouples infection from TMPRSS2

378 Next, we aimed to corroborate our findings regarding the S2' site as TMPRSS2 target site for  
379 cell-cell fusion in pseudoparticle infection. Our SARS2-S2'-GH mutant was efficiently  
380 incorporated into lentiviral particles, as was SARS2-S1/S2-mut (Fig. 7 D). Both spike mutants  
381 could drive entry into 293T cells expressing ACE2/TMPRSS2, but SARS2-S2'-GH with reduced  
382 efficiency and SARS2-S1/S2-mut probably with increased efficiency, although we did not test for  
383 the latter (Fig. 7 E). None of the spike variants was inhibited by Batimastat. SARS2-S wt and  
384 SARS2-S1/S2-mut were inhibited by Camostat, but not by Batimastat or E64-d, indicating  
385 proteolytic activation by TMPRSS2. The S2' mutant on the other hand was exclusively inhibited  
386 by E64-d, indicating that it was refractory to activation by TMPRSS2 and dependent on  
387 activation by Cathepsins.

388

389 SARS-CoV-2 is weakly inhibited by Ambroxol on Calu-3 lung cells.

390 As transfected 293T cells express TMPRSS2 at high and possibly variable levels between cells,  
391 and allow for at least some entry via endocytosis, weak modulatory effects on ACE2 or TMPRSS2  
392 might be missed in that system. Calu-3 cells express TMPRSS2 to much higher levels than 293T  
393 (Fig. 8 A), which are practically negative, but still at endogenous levels. We therefore infected  
394 the Calu-3 lung cell line with our lentiviral pseudoparticles (Fig. 8 B). These cells allow for  
395 infection by our lentiviral pseudoparticles only at very low levels (not shown). In order to  
396 achieve infection at faithfully detectable levels, we used the D614G variant, which exhibited the  
397 same sensitivity profile to inhibitors but was about one log more efficient at driving entry (Fig. 7  
398 C). By now, D614G has become the dominant variant globally and is therefore probably also  
399 more relevant. As expected, SARS2-S-driven entry was practically abrogated by 50 $\mu$ M Camostat.  
400 Bromhexine again had no detectable impact on SARS2-S-driven entry. Ambroxol on the other  
401 hand exhibited a weakly inhibitory effect on SARS2-S-driven infection in this system, even if that  
402 needs a linear scale for proper visualization. Interestingly, both substances, but Bromhexine  
403 more so, affected entry of VSV-G-pseudotyped particles negatively. This is likely owed to the  
404 targeting of lysosomal processes by these two substances (39, 40). Finally, we wanted to test  
405 whether this small but detectable effect would translate into inhibition of authentic virus. We  
406 therefore infected Calu-3 with a clinical isolate of SARS-CoV-2 at low MOI and quantified the  
407 viral RNA after 20-24h by RT-qPCR (Fig. 8 C). We chose 5 $\mu$ M and 50 $\mu$ M as concentrations for  
408 Ambroxol and Bromhexine, 10 $\mu$ M for Batimastat. For Ambroxol, which is heavily enriched in  
409 lung tissue, 50 $\mu$ M might be a clinically attainable concentration. Interestingly, for Ambroxol and  
410 Bromhexine, viral RNA copy number trended lower upon treatment, and in a dose-dependent  
411 manner as can be observed in the raw Ct values (Fig. 8 C) and after relative quantification (Fig. 8  
412 D). Both, reduction by Ambroxol and by Bromhexine at 50 $\mu$ M was significant, even if inhibition

413 by Ambroxol remained only significant without correction for multiple comparisons, which is  
414 appropriate in light of a dose response (ANOVA with post test for linear trend in Ct values at  
415 0 $\mu$ M, 5 $\mu$ M, and 50 $\mu$ M, significant for Ambroxol and Bromhexine). 10 $\mu$ M Batimastat (compared  
416 to the DMSO solvent) had no significant effect on SARS-CoV-2 mRNA level, even if DMSO alone  
417 had quite some impact compared to water, most likely due to the high concentration needed,  
418 which was 1%. In a cell viability assay with Calu-3 using dilutions of commercial over-the-  
419 counter cough thinners, neither Bromhexine nor Ambroxol exhibited significant effects up to  
420 10 $\mu$ M (Fig. 8E). We used the cough thinners as an alternative source of Ambroxol and  
421 Bromhexine for some control experiments, which were not included in this manuscript, to  
422 control for specificity of the observed effects and their independence from the source of the  
423 two substances. Bromhexine but not Ambroxol clearly impacted cell viability at 100 $\mu$ M, which is  
424 compatible with our observations on 293T (Fig. 4C), although it should be noted that toxicity of  
425 Bromhexine may have been overestimated in Fig. 8 E due to non-active ingredients of the cough  
426 thinner.

427

428

## 429 **DISCUSSION**

430 We have established a two-hybrid-based protocol for measuring spike-mediated cell-cell fusion  
431 that allows for the quantitation of cell-cell fusion by luciferase activity and visualization of  
432 syncytia by GFP fluorescence. Our finding that SARS1-S-mediated and SARS2-S-mediated fusion  
433 activity is activated by the ACE2 receptor is in accordance with published data (11), whereas our  
434 finding that SARS2-S-mediated cell-cell fusion is relatively more restricted by ACE2 expression  
435 and less by proteolytic activation than SARS1-S-mediated fusion is novel. This is because SARS-

436 CoV-2 can efficiently utilize metalloproteases for activation of cell-cell fusion. Further, we have  
437 faithfully established the S2' site of SARS2-S as the target for TMPRSS2-mediated activation  
438 through generation of a mutant that is defective for TMPRSS2 activation but otherwise fully  
439 functional.

440 In our system, TMPRSS2 co-expression on ACE2 expressing target cells was not required for  
441 SARS2-S-mediated fusion of ACE2 overexpressing 293T cells comparable with results of Ou et al.  
442 where ACE2 expression alone was also sufficient to induce cell-cell fusion without addition of  
443 exogenous protease (11), and also corroborated by a very recent report (41). Furthermore, we  
444 did not observe any effect on SARS2-S-mediated fusion activity upon inhibition of TMPRSS2 on  
445 target cells by the serine protease inhibitor Camostat when ACE2 was present. Together, these  
446 results imply that proteolytic activation by TMPRSS2 may not be a limiting factor for cell-cell  
447 fusion in 293T cells. A recent report demonstrated that upon co-transfection of spike, ACE2, and  
448 TMPRSS2, TMPRSS2 accelerates fusion. The size of the resulting syncytia only showed a  
449 TMPRSS2 dependency within the first 12h but was independent after 24h in that report (42),  
450 which is compatible with our observations of efficient cell-cell-fusion without TMPRSS2 in 293T.  
451 While SARS1-S-mediated cell-cell fusion was also weakly activated when ACE2 was expressed  
452 alone, activation was much higher in the presence of TMPRSS2, indicating stronger dependence  
453 of SARS1-S on TMPRSS2, compatible with the monobasic S1/S2 cleavage site in the SARS-CoV  
454 spike protein. Surprisingly, we even observed maximal activation with overexpression of only  
455 TMPRSS2, indicating that SARS1-S-mediated cell-cell fusion is mostly protease- and not ACE2-  
456 driven. In line with this observation, SARS1-S-mediated cell-cell fusion was clearly sensitive to  
457 Camostat, which reversed the TMPRSS2-mediated activation (Fig. 3 A).



458 Interestingly, mutational ablation of the S1/S2 cleavage site of SARS2-S rendered the mutated  
459 spike protein sensitive to inhibition by Camostat in the presence of ACE2 and TMPRSS2 (Fig. 3  
460 A), suggesting that TMPRSS2 or a related protease is required for processing at the S2' site to  
461 reach full activation when the S1/S2 site is not cleaved. In addition, in the absence of  
462 recombinantly expressed TMPRSS2, SARS2-S1/S2-mut was clearly impaired with regard to  
463 fusion activity (Fig. 2 A). Conversely, mutation of the S2' priming site abrogated any effects of  
464 TMPRSS2 on SARS2-S-mediated fusion, e.g. when TMPRSS2 alone was provided by means of  
465 recombinant expression (Figs. 3 A, 6 A), or when TMPRSS2 was inhibited by Camostat (Fig. 6 E).  
466 It should be noted that the SARS2-S S2' mutants were still fusogenic in the presence of high  
467 levels of ACE2 receptor (Figs. 2 A, 3 A, and 6 A, E), in the case of the GH and HH S2' mutants  
468 even at moderate ACE2 levels, and in the absence of TMPRSS2 with similar activity as wildtype  
469 (Fig. 6 A). The S2' GH mutant was also efficiently incorporated in (Fig. 7 D) and able to drive  
470 infection of pseudotyped lentiviral particles (Fig. 7 E). With wt SARS2-S or SARS2-S1/S2-mut, but  
471 not with the SARS2-S S2' mutants, recombinant expression of TMPRSS2 led to low but  
472 detectable fusion activity (Figs. 2 A, 6 A). Collectively, these findings identify the S2' site as the  
473 primary target of TMPRSS2 for fusion activation.

474 Another observation was that the S2'-AA mutant, as observed in Figs. 1 C and 6 C, exhibited  
475 drastically reduced surface expression. In fact, a similar incorporation defect has been described  
476 in the literature for SARS-CoV (43). Whatever the reason for this defect, we were able to  
477 overcome it completely by replacing the S2' motif KR with the amino acids GH, which restored  
478 surface expression (Fig. 6 C), processing into S1 and S2 subunits (Fig. 6 B), and particle  
479 incorporation (Fig. 7 D). The reasons for this phenomenon are unclear. Charge reversal of S2'  
480 from KR to EE was definitely detrimental to activity, indicating that solubility may not be the

481 critical point. As histidine may carry a positive charge depending on the local environment, our  
482 findings might hint at a requirement for at least one positive charge at this position.

483 Our results clearly demonstrate that cleavage at the S1/S2 site alone is not sufficient for fusion  
484 activity in the presence of ACE2 and requires additional processing at S2' or another site (26).  
485 This has been established for particle entry (24), but it was not entirely clear for cell-cell fusion,  
486 as the pre-cleaved spike was clearly fusogenic also in conditions without exogenous protease  
487 activity in several reports (11, 12, 26, 42), which could have been interpreted as a cell-cell  
488 fusion-ready state after S1/S2 cleavage. While our initial attempts to block the fusion activity of  
489 wt SARS2-S and the S1/S2 mutant in the presence of ACE2 receptor but without TMPRSS2 were  
490 relatively unsuccessful, treatment with the metalloprotease inhibitor Batimastat reduced fusion  
491 by both wt (Fig. 5 A) and the S1/S2 mutant (Fig. 5 C), as well as fusion by the S2' mutants (Fig. 6  
492 E). These findings indicate that metalloproteases can activate SARS2-S, and that this activation  
493 occurs at least in part independently of the S1/S2 site and of the S2' site, as both mutants were  
494 still Batimastat-sensitive. On the other hand, the S1/S2 mutant was clearly less active in the  
495 absence of TMPRSS2, indicating that matrix metalloproteases activate more efficiently when the  
496 S1/S2 site is present. These findings are in line with a very recent report describing similar  
497 observations using different inhibitors (41).

498 As SARS2-S did not require TMPRSS2 on target cells for robust cell-cell fusion, our attempts to  
499 test the impact of Bromhexine as a specific inhibitor of TMPRSS2 on SARS2-S-mediated fusion  
500 activity were somewhat artificial. Nevertheless, SARS1-S-mediated fusion was clearly enhanced  
501 by TMPRSS2, as was fusion by SARS2-S1/S2-mut, and both were inhibited by Camostat but not  
502 by Bromhexine. Therefore, our finding that Bromhexine specifically enhanced fusion of 293T  
503 cells in the presence of SARS2-S, ACE2, and TMPRSS2 is something that we cannot explain easily.

504 According to our results the Bromhexine-mediated enhancement was specific for SARS2-S and  
505 was not seen with VSV-G as fusion effector (Fig. 3 C), nor did we observe significant effects with  
506 the SARS2-S mutants or SARS1-S (Fig. 3 A). We observed some inhibition of SARS1-S-mediated  
507 fusion in the presence of 50 $\mu$ M Ambroxol (Fig. 3 A) and also with SARS2-S with longer  
508 incubation times (Fig. 3 C), which may hint at some activity of this substance against TMPRSS2,  
509 which would fit with the observation of an atypical autoproteolytic fragment of TMPRSS2 in the  
510 presence of Ambroxol. The observation of the paradoxical effect of Bromhexine in the presence  
511 of TMPRSS2 suggests that Bromhexine somehow modulates proteolytic processing. It is at the  
512 moment not clear by what mechanism of action Bromhexine modulates TMPRSS2 activity, if it  
513 does so, and we therefore cannot exclude that processing of some substrates is actually  
514 enhanced or altered instead of inhibited, as reported for several substrates (15, 44). Recently,  
515 another study also reported lack of inhibitory activity of Bromhexine against TMPRSS2 (30).  
516 Activity of Bromhexine against TMPRSS2-mediated receptor shedding, which could also explain  
517 our observations, was not observed, in contrast to Camostat that increased ACE2 expression  
518 levels in the presence of TMPRSS2 (Figs. 3 B, 5 B). This may explain the slight increase, even if  
519 not always statistically significant, in fusion activity that we observed in some experiments with  
520 SARS2-S in the presence of Camostat when ACE2 and TMPRSS2 were co-expressed (Figs. 3 A, 5  
521 A).

522 Compared to another study (45), our fusion assay yields slightly different results, with SARS2-S-  
523 mediated fusion appearing less dependent on activation by TMPRSS2. This could be due to  
524 differences in the protocol. The study by Yamamoto et al. allowed only for very short contact  
525 times of 4h and used non-adherent 293T FT cells, whereas we co-cultured the cells for a longer  
526 time, which allows for extended contact between cells and may enable the action of matrix

527 metalloproteases. Our finding that TMPRSS2 is not required for fusion is in line with several  
528 reports making the same observation (11, 24, 26, 41, 42, 46). In general, we observed a higher  
529 fusion activity with our SARS2-S1/S2-mut spike mutant than was observed with furin cleavage  
530 site mutants in previous studies (12, 26), but we observed this only when TMPRSS2 was  
531 recombinantly overexpressed together with ACE2. When only ACE2 or only TMPRSS2 were  
532 recombinantly expressed, SARS2-S1/S2-mut fusion activity was strongly impaired (Fig. 2 A). It  
533 should be noted, that we left the loop intact and only replaced the basic residues with alanine in  
534 our mutant whereas other groups deleted the loop structure, which may result in a less flexible  
535 conformation. Nevertheless, our mutational approach for ablating the furin cleavage site clearly  
536 rendered the spike protein more dependent on additional serine protease activity by  
537 recombinantly expressed TMPRSS2. This proteolytic activity was directed towards the S2' site,  
538 as SARS2-S1/S2-mut fusion activity was dependent on TMPRSS2 and was significantly inhibited  
539 by Camostat (Fig. 3 A) in the presence of TMPRSS2.

540 Taken together, our results actually reconcile several seemingly conflicting observations by  
541 other groups. The strong reduction in fusion activity by mutation of the S1/S2 site observed in  
542 one study in Vero (12) is reflected in our experimental conditions with only TMPRSS2 and  
543 endogenous levels of ACE2 expression, whereas our findings of more or less normal fusion  
544 activity under conditions of high-level ACE2 and TMPRSS2 expression are similar to the findings  
545 of another group with ACE2 overexpressing cells and addition of Trypsin or HAT (26).

546 Overall, we propose that the dependence on S1/S2 cleavage, activity of TMPRSS2 or a related  
547 protease and receptor expression are to a certain degree interdependent, where one factor can  
548 at least partially compensate for another, e.g. more extensive proteolytic activation at S2' can  
549 render the spike more fusogenic even with lower receptor levels, which was particularly

550 observed for SARS1-S, and to a lesser degree for SARS2-S (Fig. 2). Similarly, Batimastat-sensitive  
551 metalloproteases can activate SARS2-S for cell-cell fusion (Fig. 5 A). This is partially dependent  
552 on the S1/S2 site, as SARS2-S1/S2-mut was still impaired in the absence of TMPRSS2 but  
553 completely independent of the S2' site, as demonstrated by full fusion activity of the SARS2-S2'-  
554 GH spike mutant on ACE2 expressing 293T cells (Fig. 6 A).

555 According to our results the requirements for cell-cell fusion and virus-cell fusion differ:  
556 Additional TMPRSS2 activity drastically enhanced pseudotype entry into transfected 293T (Fig. 7  
557 A) but was not needed for cell-cell fusion with identically transfected 293T cells (Figs. 2 A, 3 A).  
558 In addition, the matrix metalloprotease inhibitor Batimastat did not affect particle entry in the  
559 presence of the TMPRSS2 inhibitor Camostat, indicating that matrix metalloproteases can  
560 activate cell-cell fusion but not particle-cell fusion (Fig. 7 C, E), at least not in our experimental  
561 system. Similar observations were previously made for SARS-CoV (34). The interpretation of  
562 these results is complicated by the ability of virus particles to enter cells through both direct  
563 membrane fusion or through an endocytotic pathway, and by different pre-priming states of  
564 viral spike proteins depending on proteolytic activity in the producer cell (47). As activation of  
565 the spike protein is expected to differ between organ systems depending on the presence of  
566 different proteolytic activities, these processes ultimately need to be studied in appropriate  
567 tissue systems or animal models. It is tempting to speculate that the relative to SARS-CoV more  
568 relaxed requirements for cell-cell fusion with regard to proteolytic activation contribute to the  
569 broad organ tropism and neuroinvasion by SARS-CoV-2, as well as the clinically observed  
570 formation of extended syncytia (13). Irrespective of the role of cell-cell fusion in COVID-19, in  
571 light of the observed paradoxical activation of cell-cell fusion by Bromhexine and its lack of  
572 inhibitory activity against entry of SARS2-S-pseudotyped lentiviruses on TMPRSS2 expressing

573 cells, we would at the moment caution against clinical use of Bromhexine for treatment or  
574 prophylaxis of COVID-19, at least at higher concentrations that aim at the inhibition of  
575 TMPRSS2. A recent, small randomized trial showed promising results for Bromhexine at 3x 8 mg  
576 per day combined with hydroxychloroquine (48), which should result in Bromhexine plasma  
577 concentrations in the range of 0.1  $\mu\text{M}$  (49). We are fairly confident to postulate that these  
578 favorable results are unlikely due to inhibition of TMPRSS2, although we can't fully exclude  
579 extremely weak activity. This view is supported by a recent study that found no effect of  
580 Bromhexine on TMPRSS2 activity (30). More likely, favorable patient outcomes are attributable  
581 to the beneficial effects of Bromhexine or its main metabolite Ambroxol on lung function,  
582 general defense mechanisms against airway infections, and inflammatory response (16–19, 50).  
583 Another recent study by Olaleye et al (21) specifically analyzed the effects of Bromhexine and  
584 Ambroxol on the interaction of ACE2 with the SARS-CoV-2 spike receptor binding domain (RBD),  
585 and reported a very peculiar behavior of these substances which in part may explain the  
586 paradoxical results of our fusion assays and would support a beneficial effect of low-dose  
587 Bromhexine, which is converted to Ambroxol *in vivo*: While Ambroxol weakly inhibited the  
588 ACE2-RBD interaction up to 100 $\mu\text{M}$  concentration, Bromhexine exhibited a biphasic behavior  
589 and was weakly inhibitory below 10 $\mu\text{M}$  but increased ACE2-RBD binding at higher  
590 concentrations in that study. Both substances were reported to weakly inhibit SARS-CoV-2-  
591 mediated cytopathic effect in culture (22), and Ambroxol was also shown to moderately impact  
592 replication of SARS-CoV-2 in that report (22), albeit on Vero cells and not lung cells. Our results  
593 suggest that Ambroxol can weakly inhibit spike-driven entry of lentiviral pseudotypes into Calu-  
594 3 cells at high but potentially attainable concentrations (Fig. 8 B), and our experiments with  
595 authentic SARS-CoV-2 on Calu-3 (Fig. 8 C, D) demonstrated a trend towards inhibition of

596 replication by both Ambroxol and Bromhexine, with Bromhexine possibly being slightly more  
597 potent, but also more toxic (Figs. 4 C, 8 E). Thus, the specificity of Bromhexine-mediated  
598 inhibition is questionable. In sum, it seems likely that Ambroxol acts weakly on TMPRSS2, which  
599 would explain its modest but significant effect on TMPRSS2-mediated activation of SARS1-S-  
600 mediated fusion (Fig 3 A). It should be noted that replication of the authentic virus can be  
601 influenced at numerous points, not necessarily only during entry, and that effects can be  
602 amplified over several replication cycles. Of course, compared to the potency of Camostat, the  
603 effect of both substances is marginal. Nevertheless, Ambroxol can be administered in high doses  
604 of 1g and more intravenously (19) or orally (51) and reportedly accumulates strongly in lung  
605 tissue (52). Thus, Ambroxol, which exhibited a trend towards inhibition of SARS2-S-mediated  
606 entry and fusion in several assays without enhancing effects as were observed with Bromhexine  
607 at high concentrations may represent an interesting option for supportive therapy at higher  
608 dosage, in particular as it is a proven therapeutic for antenatal respiratory distress syndrome  
609 (53) and has shown efficacy in the treatment of radiation-induced lung injury (50).

610

## 611 **MATERIAL AND METHODS**

### 612 **Cell culture**

613 All cell lines in this study were incubated at 37°C and 5% CO<sub>2</sub>. 293T (a kind gift from Vladan  
614 Rankovic and originally purchased from the ATCC, Göttingen) and Calu-3 cells (a kind gift from  
615 Stefan Ludwig) were cultured in Dulbecco's Modified Eagle Medium (DMEM), high glucose,  
616 GlutaMAX, 25mM HEPES (Thermo Fisher Scientific) supplemented with 10% fetal calf serum  
617 (FCS) (Thermo Fisher Scientific), and 50µg/ml gentamycin (PAN Biotech). For Calu-3 cells 1mM  
618 Sodium-Pyruvate (Thermo Fisher Scientific) was added. For seeding and sub-culturing of cells

619 the medium was removed, the cells were washed with PBS (PAN-Biotech) and detached with  
620 Trypsin (PAN-Biotech). All transfections were performed using PEI (Polysciences) in a 1:3 Ratio  
621 ( $\mu\text{g DNA}/\mu\text{g PEI}$ ) mixed in OptiMEM. The cell viability assay with Calu-3 (Fig. 8 E) was performed  
622 as described previously (7); unlike for the other assays in this series of experiments Bromhexine  
623 and Ambroxol were used in the form of commercial cough suppressants (Bromo 12mg/ml,  
624 Krewel Meuselbach, and Mucosolvan 30mg/5ml, Sanofi-Aventis).

625

626

## 627 **Plasmids**

628 Expression plasmids for pQCXIPBL-hTMPRSS2 (54), pCG1-SARS-2-S\_humanized (55), pCG1-ACE2  
629 (7) and pCG1-SARS S (56) are described elsewhere. For generation of pVAX1-SARS2-S the codon-  
630 optimized sequence encoding the spike protein of SARS-CoV-2 was amplified by PCR and cloned  
631 into the pVAX1 backbone. psPAX2 and pMD2.G were a gift from Didier Trono (Addgene plasmid  
632 # 12260, Addgene plasmid # 12259) and pLenti CMV GFP Neo (657-2) was a gift from Eric  
633 Campeau & Paul Kaufman (Addgene plasmid # 17447). Expression plasmids SARS2-S2'-AA,  
634 SARS2-S1/S2-mut, and SARS2-D614G were generated from pCG1\_SL-Cov\_Wuhan-S\_humanized  
635 SARS2-S by PCR based mutation of the SARS2-S S1/S2 and the S2' cleavage site using around-  
636 the-horn PCR mutagenesis using S7 Fusion PCR (Biozym) or Phusion PCR, T4 PNK and Quick  
637 ligase (all from New England Biolabs) and using the following primers: primers S1-S2 AAAA mut  
638 for V2 (CTGCCTCTGTGGCCAGCCAGAGCATC), S1-S2 AAAA mut rev V2  
639 (CAGCGGCGGGGCTGTTTGTCTGTGTCTG), S2 to AA mut\_Forward  
640 (GCCAGCTTCATCGAGGACCTGCTG) and S2 to AA mut\_Reverse  
641 (AGCGCTGGGCTTGCTAGGATCGG), SARS2S R815 H for (CACAGCTTCATCGAGGACCTGCTG),



642 SARS2S K814H rev (GTGGCTGGGCTTGCTAGGATCGG), SARS2S R815E for  
643 (GAGAGCTTCATCGAGGACCTGCTG), SARS2S K814E rev (CTCGCTGGGCTTGCTAGGATCGG),  
644 SARS2S R815E for (GAGAGCTTCATCGAGGACCTGCTG), SARS2S R815S for  
645 (AGCAGCTTCATCGAGGACCTGCTG), SARS2S K814G rev (TCCGCTGGGCTTGCTAGGATCGG), D614G  
646 for aroundthehorn (GCGTGAAGTGTACCGAAGTGCC), D614G rev aroundthehorn  
647 (CCTGGTACAGCACTGCCACCTG). Sequence integrity was verified by sequencing of the coding  
648 region. Plasmid pCG1-SARS2-S\_S2'mut contains a silent G to T mutation in the codon for leucine  
649 441.  
650 Expression plasmids pVAX1-SARS2-S\_S2'-GH, pVAX1-SARS2-S1/S2-mut and pVAX1-SARS2-  
651 S\_D614G were generated from pVAX1-SARS2-S by PCR-based mutation in a similar manner.  
652 The Gal4-Luc reporter plasmid encoding firefly luciferase under the control of an activator  
653 sequence that binds the Gal4 transcription factor has been described elsewhere (34). The Gal4  
654 DNA binding domain VP16 fusion plasmid corresponds to Genbank identifier X85976. The  
655 TurboGFP-Luciferase fusion reporter gene was constructed using Gibson Assembly Master Mix  
656 (New England Biolabs) to insert the TurboGFP open reading frame with a Ser-Gly-Ser-Gly Linker  
657 in front of the Met codon of the luciferase open reading frame. Before assembly, the two  
658 fragments were generated using Phusion PCR (New England Biolabs) by amplifying the  
659 TurboGFP open reading frame from the vector pGIPZ (Thermo Scientific Open Biosystems) using  
660 the primers TurboGFP for Gal4Luc before ATG ov  
661 (GGTACTGTTGGTAAAATGGAGAGCGACGAGAGC) and TurboGFP rev  
662 (TTCTTCACCGGCATCTGCATC), and the Gal4-Luc backbone by amplification with primer Gal4Luc  
663 before ATG rev (TTTACCAACAGTACCGGAATGC) and primer Luc for SGSG TurboGFP overhang  
664 (GATGCAGATGCCGGTGAAGAAAGCGGTAGCGGTATGGAAGACGCCAAAACATAAAG).

665 The pLentiCMV-TurboGFP::Luciferase fusion reporter gene was constructed using Gibson  
666 Assembly Master Mix (New England Biolabs) to exchange the insert in pLenti-CMV-Blast-EphA7-  
667 Strep (described elsewhere (57)) with the TurboGFP::Luc open reading frame without the Strep-  
668 Tag, the two fragments were generated using CloneAmp HiFi PCR Premix (Takara Bio) by  
669 amplifying the TurboGFP::Luc open reading frame from the Vector Gal4-TurboGFP-Luc using the  
670 primers GA\_TurboGFP::Luc\_pLentiBlast-StrepOneOv\_For  
671 (acaaaaaagcaggctccaccATGGAGAGCGACGAGAGC) and GA\_TurboGFP::Luc\_pLentiBlast-  
672 StrepOneOv\_Rev (tgtggatggctccaagcgctTTACAATTTGGACTTTCCGCC), and the pLenti-CMV-Blast-  
673 EphA7-Strep backbone by amplification with primer pLenti attB1 rev at ATG  
674 (CATGGTGGAGCCTGCTTTTTTGTAC) and OneStrep for (AGCGCTTGGAGCCATCCAC).

675

#### 676 **Western blot**

677 Protein expression was analyzed by polyacrylamide gel electrophoresis on 8%-16% precast  
678 gradient gels (Thermo) and Western blotting using antibodies to ACE2 (AF933, R&D Systems), c-  
679 Myc-epitope (clone 9E10, Santa Cruz Biotechnology), SARS spike (NB100-56578, Novus  
680 Biologicals), HIV-1 Gag p24 (clone 749140, R&D), and GAPDH (GenScript) in NETT-G (150 mM  
681 NaCl, 5mM EDTA, 50 mM Tris, 0.05% Triton X-100, 0.25% gelatin, pH 7.5) and donkey anti-  
682 mouse horseradish peroxidase (HRP)-coupled (Dianova), goat anti-rabbit HRP-coupled (Life  
683 Technologies) or rabbit anti-goat HRP-coupled (Proteintech) secondary antibody in 5% dry milk  
684 powder in PBS with 0.05% Tween 20. Imaging was performed using Immobilon Forte substrate  
685 (Merck) on an INTAS ECL ChemoCam system.

686

#### 687 **Flow cytometry**

688 293T cells were transfected with the respective spike expression constructs. On day two post  
689 transfection, the cells were harvested by gentle pipetting in PBS and were fixed in 2% methanol-  
690 free formaldehyde in PBS for 15 min. The cells were then washed once in PBS and then  
691 incubated in 10% FCS in PBS for 30 min to block non-specific binding. The cells were then  
692 incubated in either convalescent serum at 1:1000 dilution or soluble ACE2-Fc fusion protein at 2  
693 ng/ $\mu$ l, both described elsewhere (58), for 1h in 10% FCS in PBS, followed by one wash in a large  
694 volume of PBS and then incubation with Alexa647-coupled anti-human secondary antibody  
695 (Thermo Fisher Scientific) at 1:200 in 10% FCS in PBS. The RRV gH $\Delta$ 21-27-Fc fusion protein,  
696 which was used as a control protein, was generated from RRV 26-95 gH-Fc (59) by deletion of  
697 the codons for amino acid 21-27, which are important for receptor binding (28), and was  
698 produced analogous to the gH-Fc protein in Hahn et al. 2013 (59). The cells were then washed  
699 once in a large volume of PBS and post-fixated in 2% PFA in PBS before analysis on an LSRII flow  
700 cytometer (BD Biosciences). Data was analyzed using Flowing software (version 2.5) and  
701 GraphPad Prism, version 6, for Windows (GraphPad Software). COVID-19 convalescent serum  
702 was collected previously (58) in accordance with ethical requirements (ethics committee UK  
703 Erlangen, license number AZ. 174\_20 B).

704

#### 705 **Fusion assay**

706 293T target cells were seeded in a 48-well plate at 50 000 cells/well and transfected with Vp16-  
707 Gal4 (Fig. 3 C) or Gal4-TurboGFP-Luciferase expression plasmid (Gal4-TurboGFP-Luc, all other  
708 experiments) as well as expression plasmids for ACE2 and TMPRSS2 as indicated. In case only  
709 ACE2 or TMPRSS2 were transfected the missing amount of DNA was replaced by empty vector.  
710 293T effector cells were seeded in a 10 cm dish at 70-80% confluency and transfected with

711 either the Vp16-Gal4 (all experiments except Fig. 3 C) or Gal4-Luciferase (Fig. 3 C) expression  
712 plasmid as well as expression plasmids for SARS2-S, SARS2-S1/S2-mut, SARS2-S2'-AA, SARS2-S2'-  
713 GH, SARS2-S2'-HH, SARS2-S2'-EE, SARS2-S2'-ES, SARS1-S, VSV-G glycoproteins or pcDNA6/V5-  
714 HisA (Thermo). For effector cell pre-incubation experiments, the medium of effector-cells was  
715 changed to Bromhexine hydrochloride (Merck), Ambroxol hydrochloride (Merck), Camostat  
716 mesylate (Tocris), Batimastat (Merck), AEBSF (Merck), EDTA (Merck), EGTA (Merck), 100x  
717 Cocktail Set V, Animal-Free - Calbiochem (Merck) or Decanoyl-RVCR-CMK (Merck) containing  
718 medium at final concentration 6h after transfection. 24h after transfection, target cells were  
719 pre-incubated with Bromhexine hydrochloride (Merck), Ambroxol hydrochloride (Merck),  
720 Camostat mesylate (Tocris), Batimastat (Merck), AEBSF (Merck), EDTA (Merck), EGTA (Merck) or  
721 Decanoyl-RVCR-CMK (Merck) for 30 min at the indicated concentration. Effector cells were then  
722 added to the target cells in a 1:1 ratio reaching the final inhibitor concentration. After 24-48h  
723 GFP-fluorescence was detected using a Vert.A1 Fluorescence Microscope and ZEN-Software  
724 (Zeiss), luciferase activity was analyzed using the PromoKine Firefly luciferase Kit or Beetle-Juice  
725 Luciferase Assay (PJKbiotech) according to manufacturer's instructions and a Biotek Synergy 2  
726 plate reader. Statistical analysis was performed using GraphPad Prism, version 6, for Windows  
727 (GraphPad Software).

728

### 729 **Production of lentiviral and pseudoparticles and pseudoparticle infection experiments**

730 Lentiviral pseudoparticles were produced by transfecting 293T cells with expression plasmids for  
731 psPAX2, pLenti-CMV-GFP or pLentiCMV-TurboGFP::Luciferase and either SARS2-S variants  
732 (pVAX1-SARS2-S\_S2'-GH, pVAX1-SARS2-S1/S2-mut and pVAX1-SARS2-S\_D614G) or VSV-G  
733 (pMD2.G Addgene #12259). The cell culture supernatants were harvested 24-72 h post

734 transfection followed by addition of fresh media and again after 48-72h. The supernatants were  
735 passed through a 0.45µm CA-Filter, and the SARS2-S pseudoparticles were concentrated via low  
736 speed centrifugation at 4°C for 16h at 4200xg. For detection of particle incorporation virus  
737 supernatant was further concentrated by centrifugation at 4°C for 2h at 21000xg on 5%  
738 Optiprep (Merck), the supernatant was removed and pellet was resuspended and subjected to  
739 Western Blot analysis. The SARS-CoV-2 spike and VSV-G lentiviral pseudoparticles were used to  
740 transduce 293T transfected with TMPRSS2 and ACE2 expression plasmids or Calu-3 cells. 48 h  
741 after transfection with control or ACE2 and TMPRSS2 expression plasmids, the pseudoparticles  
742 were added to the cells pre-incubated with inhibitors Bromhexine hydrochloride (Merck),  
743 Ambroxol hydrochloride (Merck), Camostat mesylate (Tocris), Batimastat (Merck), AEBSF  
744 (Merck) and E64-d (Biomol) for 30 min at twice the indicated concentration, the final  
745 concentration was reached after addition of the inoculum. Cells transduced with pLenti-CMV-  
746 GFP pseudoparticles were harvested 48 h after transduction using trypsin. Bald particles from  
747 293T cells that were transfected with empty vector instead of glycoprotein expression plasmids  
748 and the lentiviral packaging system were used as background control for normalization. Trypsin  
749 activity was inhibited by adding 5% FCS in PBS, and after washing with PBS the cells were fixed  
750 with 4% formaldehyde (Roth) in PBS. The percentages of GFP-positive cells were determined  
751 using a LSRII flow cytometer, and at least 10000 cells were analyzed. Cells transduced with  
752 pLentiCMV-TurboGFP::Luciferase pseudoparticles were lysed after 48h with Luciferase-Lysis  
753 Buffer (Promega) and detected using Beetle-Juice Luciferase Assay according to manufacturer's  
754 instructions and a Biotek Synergy 2 platereader. Statistical analysis was performed using  
755 GraphPad Prism 6.  
756

757 **SARS-CoV-2 infections**

758 Primary SARS-CoV-2 isolate ER-PR2 was a kind gift from Klaus Überla, Erlangen, and was  
759 originally isolated on Vero cells. The virus stock was then grown on Calu-3 cells in EMEM + 2%  
760 FCS + Penicillin/Streptomycin. Virus containing supernatant was harvested after CPE was clearly  
761 visible, and the supernatant was cleared by low-speed centrifugation at 1200 rpm for 10min  
762 before passage through a 0.2µm syringe filter (Mini-Sart, Sartorius). Virus stocks were aliquoted  
763 in 200µl aliquots and stored at -150°C. Infectivity was determined by the method of Reed and  
764 Muench (60) at  $10^{6.1}$  TCID50/ml. Calu-3 cells were seeded one day (first experiment) or two days  
765 (other two experiments) before infection and approx. 100000 Calu-3 cells were infected at a  
766 multiplicity of infection (MOI) of approximately 0.002 in a 96-well plate in triplicates. The cells  
767 were pre-incubated with the respective inhibitors in 50µl at twice the concentration for ~1.5h,  
768 the virus was then added in 50µl medium. Total RNA from the cells and the culture supernatant  
769 was harvested 20h (experiment 3) and 24h (experiments 1&2) post infection.

770

771 **RNA isolation, cDNA synthesis, and RT-qPCR**

772 RNA was isolated using the Direct-zol RNA Miniprep Plus Kit (Zymo) according to the  
773 manufacturer's instructions. For quantification of viral RNA in infected cultures, the cells and  
774 cellular supernatant in a volume of 100µl were lysed and inactivated by addition of 300µl TRI  
775 reagent (Zymo). RT-qPCR on viral genomes was performed using the N1 CDC primer set from  
776 IDT (2019-nCoV\_N1-F GACCCCAAATCAGCGAAAT and 2019-nCoV\_N1-R  
777 TCTGGTTACTGCCAGTTGAATCTG, both 500nM, 2019-nCoV\_N1-P FAM-ACC CCG CAT TAC GTT  
778 TGG TGG ACC-BHQ1, 125nM) and SensiFAST Probe Hi-ROX One-Step Kit (Bioline) according to  
779 the manufacturer's instructions in a 20µl reaction with 5µl sample. All RT-qPCR reactions were

780 performed in technical duplicates on a StepOne Plus (Thermo) realtime cycler. PCR conditions  
781 were 45°C for 10min, 95°C for 2min, and then 45 cycles 95°C for 5sec followed by 55°C for  
782 20sec. To determine the PCR efficiency across the whole dynamic range, a 7-step 10-fold  
783 dilution series with the H<sub>2</sub>O-treated SARS-CoV-2-infected Calu-3 sample was performed. These  
784 datapoints with the undiluted sample set to 1 was approximated by an exponential function  
785 using Microsoft Excel 2020. The measured PCR efficiency was additionally fitted by  
786 multiplication with a constant factor to match our RNA standard (Charite, Berlin), which was  
787 only available at 50, 500, and 5000 copies, which confirmed our approach, but was not used for  
788 relative quantification. Fit was performed by minimizing the sum of the squared relative  
789 deviations from the standard concentrations with an exactness of two digits.

790 For quantification of cellular TMPRSS2 and GAPDH expression cDNA synthesis and qPCR were  
791 performed according to the manufacturer's instructions using the SensiFast cDNA kit and  
792 SensiFAST SYBR qPCR kit (both from Biorline). The qPCR was run on a StepOnePlus realtime PCR  
793 cycler (Thermo) and analyzed using the StepOne Software, which was also used to calculate  
794  $\Delta\Delta C_t$  values and error estimates for TMPRSS2 expression. TMPRSS2 mRNA was detected using  
795 primer set Hs.PT.58.39408998 (IDT) (forward primer GTCAAGGACGAAGACCATGT, reverse  
796 primer TGCCAAAGCTTACAGACCAG). GAPDH mRNA was detected using primers GAPDH\_Hs-  
797 Mm\_s (CTTTGGTATCGTGGAAGGACTC) and GAPDH\_Hs-Mm\_as (GTAGAGGCAGGGATGATGTTC).  
798 Amplifications with Ct above 35 and non-matching melting curve were scored as not detected.

799

## 800 **ACKNOWLEDGEMENTS**

801 We thank Stefan Pöhlmann and Markus Hofmann for sharing reagents and for critical reading of  
802 the manuscript and helpful discussions. We thank Klaus Überla for sharing SARS-CoV-2 ER-PR2.  
803 We also thank Armin Ensser and Florian Full for helpful discussions.

804

## 805 **FUNDING**

806 This work was supported by grants HA 6013/4-1 and HA 6013/6-1 to A.S.H. from the Deutsche  
807 Forschungsgemeinschaft and by grant 2019.027.1 to A.S.H. from the Wilhelm-Sander-Stiftung.

808

809

810

## 811 **REFERENCES**

812

- 813 1. Zhou P, Yang X-L, Wang X-G, Hu B, Zhang L, Zhang W, Si H-R, Zhu Y, Li B, Huang  
814 C-L, Chen H-D, Chen J, Luo Y, Guo H, Jiang R-D, Liu M-Q, Chen Y, Shen X-R, Wang X,  
815 Zheng X-S, Zhao K, Chen Q-J, Deng F, Liu L-L, Yan B, Zhan F-X, Wang Y-Y, Xiao G-F, Shi Z-  
816 L. 2020. A pneumonia outbreak associated with a new coronavirus of probable bat origin. *Nature*  
817 *579*:270–273.
- 818 2. Zang R, Gomez Castro MF, McCune BT, Zeng Q, Rothlauf PW, Sonnek NM, Liu Z,  
819 Brulois KF, Wang X, Greenberg HB, Diamond MS, Ciorba MA, Whelan SPJ, Ding S. 2020.  
820 TMPRSS2 and TMPRSS4 promote SARS-CoV-2 infection of human small intestinal  
821 enterocytes. *Sci Immunol* 5.
- 822 3. Bojkova D, McGreig JE, McLaughlin K-M, Masterson SG, Widera M, Krähling V,  
823 Ciesek S, Wass MN, Michaelis M, Cinatl J. 2020. SARS-CoV-2 and SARS-CoV differ in their  
824 cell tropism and drug sensitivity profiles. *bioRxiv* 2020.04.03.024257.
- 825 4. Hui KPY, Cheung M-C, Perera RAPM, Ng K-C, Bui CHT, Ho JCW, Ng MMT, Kuok  
826 DIT, Shih KC, Tsao S-W, Poon LLM, Peiris M, Nicholls JM, Chan MCW. 2020. Tropism,  
827 replication competence, and innate immune responses of the coronavirus SARS-CoV-2 in human  
828 respiratory tract and conjunctiva: an analysis in ex-vivo and in-vitro cultures. *Lancet Respir Med*  
829 [https://doi.org/10.1016/S2213-2600\(20\)30193-4](https://doi.org/10.1016/S2213-2600(20)30193-4).
- 830 5. Li W, Moore MJ, Vasilieva N, Sui J, Wong SK, Berne MA, Somasundaran M, Sullivan  
831 JL, Luzuriaga K, Greenough TC, Choe H, Farzan M. 2003. Angiotensin-converting enzyme 2 is a  
832 functional receptor for the SARS coronavirus. *Nature* *426*:450–454.
- 833 6. Letko M, Marzi A, Munster V. 2020. Functional assessment of cell entry and receptor  
834 usage for SARS-CoV-2 and other lineage B betacoronaviruses. *Nat Microbiol* *5*:562–569.



- 835 7. Hoffmann M, Kleine-Weber H, Schroeder S, Krüger N, Herrler T, Erichsen S, Schiergens  
836 TS, Herrler G, Wu N-H, Nitsche A, Müller MA, Drosten C, Pöhlmann S. 2020. SARS-CoV-2  
837 Cell Entry Depends on ACE2 and TMPRSS2 and Is Blocked by a Clinically Proven Protease  
838 Inhibitor. *Cell* 181:271-280.e8.
- 839 8. Heald-Sargent T, Gallagher T. 2012. Ready, set, fuse! The coronavirus spike protein and  
840 acquisition of fusion competence. *Viruses* 4:557–580.
- 841 9. Matsuyama S, Nao N, Shirato K, Kawase M, Saito S, Takayama I, Nagata N, Sekizuka T,  
842 Katoh H, Kato F, Sakata M, Tahara M, Kutsuna S, Ohmagari N, Kuroda M, Suzuki T, Kageyama  
843 T, Takeda M. 2020. Enhanced isolation of SARS-CoV-2 by TMPRSS2-expressing cells. *Proc*  
844 *Natl Acad Sci U S A* 117:7001–7003.
- 845 10. Shulla A, Heald-Sargent T, Subramanya G, Zhao J, Perlman S, Gallagher T. 2011. A  
846 transmembrane serine protease is linked to the severe acute respiratory syndrome coronavirus  
847 receptor and activates virus entry. *J Virol* 85:873–882.
- 848 11. Ou X, Liu Y, Lei X, Li P, Mi D, Ren L, Guo L, Guo R, Chen T, Hu J, Xiang Z, Mu Z,  
849 Chen X, Chen J, Hu K, Jin Q, Wang J, Qian Z. 2020. Characterization of spike glycoprotein of  
850 SARS-CoV-2 on virus entry and its immune cross-reactivity with SARS-CoV. 1. *Nat Commun*  
851 11:1–12.
- 852 12. Hoffmann M, Kleine-Weber H, Pöhlmann S. 2020. A Multibasic Cleavage Site in the  
853 Spike Protein of SARS-CoV-2 Is Essential for Infection of Human Lung Cells. *Mol Cell* 78:779-  
854 784.e5.
- 855 13. Giacca M, Bussani R, Schneider E, Zentilin L, Collesi C, Ali H, Braga L, Secco I, Volpe  
856 MC, Colliva A, Zanconati F, Berlot G, Silvestri F, Zacchigna S. 2020. Persistence of viral RNA,  
857 widespread thrombosis and abnormal cellular syncytia are hallmarks of COVID-19 lung  
858 pathology. *medRxiv* 2020.06.22.20136358.
- 859 14. Ziegler CGK, Allon SJ, Nyquist SK, Mbanjo IM, Miao VN, Tzouanas CN, Cao Y, Yousif  
860 AS, Bals J, Hauser BM, Feldman J, Muus C, Wadsworth MH, Kazer SW, Hughes TK, Doran B,  
861 Gatter GJ, Vukovic M, Taliaferro F, Mead BE, Guo Z, Wang JP, Gras D, Plaisant M, Ansari M,  
862 Angelidis I, Adler H, Sucre JMS, Taylor CJ, Lin B, Waghray A, Mitsialis V, Dwyer DF,  
863 Buchheit KM, Boyce JA, Barrett NA, Laidlaw TM, Carroll SL, Colonna L, Tkachev V, Peterson  
864 CW, Yu A, Zheng HB, Gideon HP, Winchell CG, Lin PL, Bingle CD, Snapper SB, Kropski JA,  
865 Theis FJ, Schiller HB, Zaragosi L-E, Barbry P, Leslie A, Kiem H-P, Flynn JL, Fortune SM,  
866 Berger B, Finberg RW, Kean LS, Garber M, Schmidt AG, Lingwood D, Shalek AK, Ordovas-  
867 Montanes J, HCA Lung Biological Network. Electronic address: lung-  
868 network@humancellatlas.org, HCA Lung Biological Network. 2020. SARS-CoV-2 Receptor  
869 ACE2 Is an Interferon-Stimulated Gene in Human Airway Epithelial Cells and Is Detected in  
870 Specific Cell Subsets across Tissues. *Cell* 181:1016-1035.e19.
- 871 15. Lucas JM, Heinlein C, Kim T, Hernandez SA, Malik MS, True LD, Morrissey C, Corey  
872 E, Montgomery B, Mostaghel E, Clegg N, Coleman I, Brown CM, Schneider EL, Craik C, Simon  
873 J, Bedalov T, Nelson PS. 2014. The Androgen-Regulated Protease TMPRSS2 Activates  
874 a Proteolytic Cascade Involving Components of the Tumor Microenvironment and Promotes  
875 Prostate Cancer Metastasis. *Cancer Discov* 4:1310–1325.
- 876 16. Renovanz VK. 1975. [Results of some clinical-pharmacological studies on ambroxol (NA  
877 872)]. *Arzneimittelforschung* 25:646–652.
- 878 17. Nobata K, Fujimura M, Ishiura Y, Myou S, Nakao S. 2006. Ambroxol for the prevention  
879 of acute upper respiratory disease. *Clin Exp Med* 6:79–83.
- 880 18. Yang B, Yao DF, Ohuchi M, Ide M, Yano M, Okumura Y, Kido H. 2002. Ambroxol  
881 suppresses influenza-virus proliferation in the mouse airway by increasing antiviral factor levels.  
882 *Eur Respir J* 19:952–958.

- 883 19. Wu X, Li S, Zhang J, Zhang Y, Han L, Deng Q, Wan X. 2014. Meta-analysis of high  
884 doses of ambroxol treatment for acute lung injury/acute respiratory distress syndrome based on  
885 randomized controlled trials. *J Clin Pharmacol* 54:1199–1206.
- 886 20. Wauer RR, Schmalisch G, Menzel K, Schröder M, Müller K, Tiller R, Methfessel G,  
887 Sitka U, Koepke E, Plath C, Schlegel C, Böttcher M, Köppe I, Fricke U, Severin K, Jacobi R,  
888 Schmidt W, Hinkel GK, Nitz I, Kunze D, Reichmann G, Lachmann B, Lampe K, Grauel EL.  
889 1982. The antenatal use of ambroxol (bromhexine metabolite VIII) to prevent hyaline membrane  
890 disease: a controlled double-blind study. *Int J Biol Res Pregnancy* 3:84–91.
- 891 21. Olaleye OA, Kaur M, Onyenaka CC. 2020. Ambroxol Hydrochloride Inhibits the  
892 Interaction between Severe Acute Respiratory Syndrome Coronavirus 2 Spike Protein's Receptor  
893 Binding Domain and Recombinant Human ACE2. *bioRxiv* 2020.09.13.295691.
- 894 22. Bradfute SB, Ye C, Clarke EC, Kumar S, Timmins GS, Deretic V. 2020. Ambroxol and  
895 Ciprofloxacin Show Activity Against SARS-CoV2 in Vero E6 Cells at Clinically-Relevant  
896 Concentrations. *bioRxiv* 2020.08.11.245100.
- 897 23. Wrapp D, Wang N, Corbett KS, Goldsmith JA, Hsieh C-L, Abiona O, Graham BS,  
898 McLellan JS. 2020. Cryo-EM structure of the 2019-nCoV spike in the prefusion conformation.  
899 *Science* 367:1260–1263.
- 900 24. Hoffmann M, Kleine-Weber H, Pöhlmann S. 2020. A Multibasic Cleavage Site in the  
901 Spike Protein of SARS-CoV-2 Is Essential for Infection of Human Lung Cells. *Mol Cell*  
902 S1097276520302641.
- 903 25. Zhu Y, Feng F, Hu G, Wang Y, Yu Y, Zhu Y, Xu W, Cai X, Sun Z, Han W, Ye R, Chen  
904 H, Ding Q, Cai Q, Qu D, Xie Y, Yuan Z, Zhang R. 2020. The S1/S2 boundary of SARS-CoV-2  
905 spike protein modulates cell entry pathways and transmission. preprint, *Microbiology*.
- 906 26. Xia S, Lan Q, Su S, Wang X, Xu W, Liu Z, Zhu Y, Wang Q, Lu L, Jiang S. 2020. The  
907 role of furin cleavage site in SARS-CoV-2 spike protein-mediated membrane fusion in the  
908 presence or absence of trypsin. *Signal Transduct Target Ther* 5.
- 909 27. Belouzard S, Chu VC, Whittaker GR. 2009. Activation of the SARS coronavirus spike  
910 protein via sequential proteolytic cleavage at two distinct sites. *Proc Natl Acad Sci* 106:5871–  
911 5876.
- 912 28. Großkopf AK, Schlagowski S, Ensser A, Desrosiers RC, Hahn AS. 2020. Plxdc family  
913 members are novel receptors for the rhesus monkey rhadinovirus (RRV). *bioRxiv*  
914 2020.01.20.912246.
- 915 29. Nimishakavi S, Raymond WW, Gruenert DC, Caughey GH. 2015. Divergent Inhibitor  
916 Susceptibility among Airway Lumen-Accessible Tryptic Proteases. *PLOS ONE* 10:e0141169.
- 917 30. Shrimp JH, Kales SC, Sanderson PE, Simeonov A, Shen M, Hall MD. 2020. An  
918 Enzymatic TMPRSS2 Assay for Assessment of Clinical Candidates and Discovery of Inhibitors  
919 as Potential Treatment of COVID-19. *ACS Pharmacol Transl Sci* 3:997–1007.
- 920 31. Kim IS, Jenni S, Stanifer ML, Roth E, Whelan SPJ, van Oijen AM, Harrison SC. 2017.  
921 Mechanism of membrane fusion induced by vesicular stomatitis virus G protein. *Proc Natl Acad*  
922 *Sci U S A* 114:E28–E36.
- 923 32. Hoffmann M, Wu Y-J, Gerber M, Berger-Rentsch M, Heimrich B, Schwemmler M,  
924 Zimmer G. 2010. Fusion-active glycoprotein G mediates the cytotoxicity of vesicular stomatitis  
925 virus M mutants lacking host shut-off activity. *J Gen Virol* 91:2782–2793.
- 926 33. Hoffmann D, Bayer W, Wildner O. 2007. Therapeutic immune response induced by  
927 intratumoral expression of the fusogenic membrane protein of vesicular stomatitis virus and  
928 cytokines encoded by adenoviral vectors. *Int J Mol Med* 20:673–681.
- 929 34. Simmons G, Bertram S, Glowacka I, Steffen I, Chaipan C, Agudelo J, Lu K, Rennekamp  
930 AJ, Hofmann H, Bates P, Pöhlmann S. 2011. Different host cell proteases activate the SARS-

- 931 coronavirus spike-protein for cell-cell and virus-cell fusion. *Virology* 413:265–274.
- 932 35. Jaimes JA, Millet JK, Whittaker GR. 2020. Proteolytic Cleavage of the SARS-CoV-2  
933 Spike Protein and the Role of the Novel S1/S2 Site. *iScience* 23:101212.
- 934 36. Davies B, Brown PD, East N, Crimmin MJ, Balkwill FR. 1993. A synthetic matrix  
935 metalloproteinase inhibitor decreases tumor burden and prolongs survival of mice bearing human  
936 ovarian carcinoma xenografts. *Cancer Res* 53:2087–2091.
- 937 37. Wojtowicz-Praga SM, Dickson RB, Hawkins MJ. 1997. Matrix metalloproteinase  
938 inhibitors. *Invest New Drugs* 15:61–75.
- 939 38. Hou YJ, Chiba S, Halfmann P, Ehre C, Kuroda M, Dinnon KH, Leist SR, Schäfer A,  
940 Nakajima N, Takahashi K, Lee RE, Mascenik TM, Graham R, Edwards CE, Tse LV, Okuda K,  
941 Markmann AJ, Bartelt L, de Silva A, Margolis DM, Boucher RC, Randell SH, Suzuki T,  
942 Gralinski LE, Kawaoka Y, Baric RS. 2020. SARS-CoV-2 D614G variant exhibits efficient  
943 replication ex vivo and transmission in vivo. *Science* <https://doi.org/10.1126/science.abe8499>.
- 944 39. Fois G, Hobi N, Felder E, Ziegler A, Miklavc P, Walther P, Radermacher P, Haller T,  
945 Dietl P. 2015. A new role for an old drug: Ambroxol triggers lysosomal exocytosis via pH-  
946 dependent  $\text{Ca}^{2+}$  release from acidic  $\text{Ca}^{2+}$  stores. *Cell Calcium* 58:628–637.
- 947 40. Takeda H, Misawa M, Yanaura S. 1983. A role of lysosomal enzymes in the mechanism  
948 of mucolytic action of bromhexine. *Jpn J Pharmacol* 33:455–461.
- 949 41. Nguyen HT, Zhang S, Wang Q, Anang S, Wang J, Ding H, Kappes JC, Sodroski J. 2020.  
950 Spike glycoprotein and host cell determinants of SARS-CoV-2 entry and cytopathic effects. *J*  
951 *Virol* <https://doi.org/10.1128/JVI.02304-20>.
- 952 42. Buchrieser J, Dufloo J, Hubert M, Monel B, Planas D, Rajah MM, Planchais C, Porrot F,  
953 Guivel-Benhassine F, Van der Werf S, Casartelli N, Mouquet H, Bruel T, Schwartz O. 2020.  
954 Syncytia formation by SARS-CoV-2-infected cells. *EMBO J* 39:e106267.
- 955 43. Belouzard S, Chu VC, Whittaker GR. 2009. Activation of the SARS coronavirus spike  
956 protein via sequential proteolytic cleavage at two distinct sites. *Proc Natl Acad Sci* 106:5871–  
957 5876.
- 958 44. Azouz NP, Klingler AM, Rothenberg ME. 2020. Alpha 1 Antitrypsin is an Inhibitor of the  
959 SARS-CoV2–Priming Protease TMPRSS2. *bioRxiv* 2020.05.04.077826.
- 960 45. Yamamoto M, Kiso M, Sakai-Tagawa Y, Iwatsuki-Horimoto K, Imai M, Takeda M,  
961 Kinoshita N, Ohmagari N, Gohda J, Semba K, Matsuda Z, Kawaguchi Y, Kawaoka Y, Inoue J.  
962 2020. The anticoagulant nafamostat potently inhibits SARS-CoV-2 infection in vitro: an existing  
963 drug with multiple possible therapeutic effects. *bioRxiv* 2020.04.22.054981.
- 964 46. Liu S, Selvaraj P, Lien CZ, Wu WW, Chou C-K, Wang TT. 2020. The PRRA insert at the  
965 S1/S2 site modulates cellular tropism of SARS-CoV-2 and ACE2 usage by the closely related  
966 Bat raTG13. *bioRxiv* 2020.07.20.213280.
- 967 47. Shang J, Wan Y, Luo C, Ye G, Geng Q, Auerbach A, Li F. 2020. Cell entry mechanisms  
968 of SARS-CoV-2. *Proc Natl Acad Sci U S A* <https://doi.org/10.1073/pnas.2003138117>.
- 969 48. Ansarin K, Tolouian R, Ardalan M, Taghizadieh A, Varshochi M, Teimouri S, Vaezi T,  
970 Valizadeh H, Saleh P, Safiri S, Chapman KR. 2020. Effect of bromhexine on clinical outcomes  
971 and mortality in COVID-19 patients: A randomized clinical trial. *BioImpacts BI* 10:209–215.
- 972 49. Bechgaard E, Nielsen A. 1982. Bioavailability of bromhexine tablets and preliminary  
973 pharmacokinetics in humans. *Biopharm Drug Dispos* 3:337–344.
- 974 50. Xia D-H, Xi L, Xv C, Mao W-D, Shen W-S, Shu Z-Q, Yang H-Z, Dai M. 2010. The  
975 protective effects of ambroxol on radiation lung injury and influence on production of  
976 transforming growth factor beta1 and tumor necrosis factor alpha. *Med Oncol Northwood Lond*  
977 *Engl* 27:697–701.
- 978 51. Mullin S, Smith L, Lee K, D'Souza G, Woodgate P, Elflein J, Hällqvist J, Toffoli M,

- 979 Streeter A, Hosking J, Heywood WE, Khengar R, Campbell P, Hehir J, Cable S, Mills K,  
980 Zetterberg H, Limousin P, Libri V, Foltynie T, Schapira AHV. 2020. Ambroxol for the  
981 Treatment of Patients With Parkinson Disease With and Without Glucocerebrosidase Gene  
982 Mutations: A Nonrandomized, Noncontrolled Trial. *JAMA Neurol* 77:427–434.
- 983 52. Li Q, Yao G, Zhu X. 2012. High-dose Ambroxol Reduces Pulmonary Complications in  
984 Patients with Acute Cervical Spinal Cord Injury After Surgery. *Neurocrit Care* 16:267–272.
- 985 53. Zhang H, Liu J, Liu T, Wang Y, Dai W. 2018. Antenatal maternal medication  
986 administration in preventing respiratory distress syndrome of premature infants: A network meta-  
987 analysis. *Clin Respir J* 12:2480–2490.
- 988 54. Kleine-Weber H, Elzayat MT, Hoffmann M, Pöhlmann S. 2018. Functional analysis of  
989 potential cleavage sites in the MERS-coronavirus spike protein. *Sci Rep* 8:16597.
- 990 55. Hoffmann M. SARS-CoV-2 Cell Entry Depends on ACE2 and TMPRSS2 and Is Blocked  
991 by a Clinically Proven Protease Inhibitor 19.
- 992 56. Hoffmann M, Müller MA, Drexler JF, Glende J, Erdt M, Gützkow T, Losemann C,  
993 Binger T, Deng H, Schwegmann-Weßels C, Esser K-H, Drosten C, Herrler G. 2013. Differential  
994 Sensitivity of Bat Cells to Infection by Enveloped RNA Viruses: Coronaviruses,  
995 Paramyxoviruses, Filoviruses, and Influenza Viruses. *PLoS ONE* 8:e72942.
- 996 57. Großkopf AK, Schlagowski S, Hörnich BF, Fricke T, Desrosiers RC, Hahn AS. 2019.  
997 EphA7 functions as receptor on BJAB cells for cell-to-cell transmission of the Kaposi's sarcoma-  
998 associated herpesvirus (KSHV) and for cell-free infection by the related rhesus monkey  
999 rhadinovirus (RRV). *J Virol* <https://doi.org/10.1128/JVI.00064-19>.
- 1000 58. Lapuente D, Maier C, Irrgang P, Hübner J, Peter AS, Hoffmann M, Ensser A, Ziegler K,  
1001 Winkler TH, Birkholz T, Kremer AE, Steininger P, Korn K, Neipel F, Überla K, Tenbusch M.  
1002 2020. Rapid response flow cytometric assay for the detection of antibody responses to SARS-  
1003 CoV-2. *Eur J Clin Microbiol Infect Dis Off Publ Eur Soc Clin Microbiol*  
1004 <https://doi.org/10.1007/s10096-020-04072-7>.
- 1005 59. Hahn AS, Desrosiers RC. 2013. Rhesus Monkey Rhadinovirus Uses Eph Family  
1006 Receptors for Entry into B Cells and Endothelial Cells but Not Fibroblasts. *PLOS Pathog*  
1007 9:e1003360.
- 1008 60. REED LJ, MUENCH H. 1938. A SIMPLE METHOD OF ESTIMATING FIFTY PER  
1009 CENT ENDPOINTS<sup>12</sup>. *Am J Epidemiol* 27:493–497.
- 1010

1011

1012

## 1013 **FIGURE LEGENDS**

1014

1015 **Figure 1: SARS2-S mediates robust fusion activity in the presence of ACE2 or ACE2 and**  
1016 **TMPRSS2 on target cells, and ablation of the S1/S2 or S2' proteolytic cleavage site affects**  
1017 **fusion activity differently.**

1018 **A** Schematic illustration of the coronavirus spike protein showing the signal peptide (SP), the  
1019 receptor binding domain (RBD), the fusion peptide (FP), the transmembrane domain (TM), the  
1020 S1/S2 cleavage site (S1/S2) and the S2 cleavage site (S2'), together with amino acid sequence  
1021 alignments of the spike proteins of SARS-CoV-2, SARS-CoV, and the SARS2-S cleavage site  
1022 mutants analyzed in this study (not exactly drawn to scale).

1023 **B** Expression of spike variants in 293T cells. The unprocessed spike (S<sub>0</sub>) and the S1/S2-site  
1024 processed (S<sub>2</sub>) spike are indicated by arrows. The expression of GAPDH served as loading  
1025 control.

1026 **C** Cell surface expression and ACE2 binding. Cell surface expression as measured by antibody  
1027 binding from a COVID-19 convalescent serum and binding of soluble ACE2-Fc to 293T cells  
1028 expressing the indicated spike proteins was determined via flow cytometry analysis and  
1029 detection with an Alexa647-coupled secondary antibody to human IgG. The percentages of  
1030 Alexa647-positive cells are shown. Error bars represent the standard deviation of three  
1031 independent experiments.

1032 **D** Cell-cell fusion assay. Effector cells (293T transfected with either empty vector or expression  
1033 plasmids for the indicated spike variants and Vp16-Gal4 transactivator) were co-cultured with  
1034 target cells (293T transfected with empty vector or ACE2/TMPRSS2 expression plasmids and  
1035 Gal4-TurboGFP-Luc reporter plasmid). After 24h luciferase activity was measured. The data  
1036 shows averaged relative luminescence units, error bars represent the standard deviations of  
1037 one representative experiment performed in triplicates.

1038 **E** Experiment as shown in **D**, except that only ACE2/TMPRSS2 target cells were analyzed. After  
1039 12h, 18h and 24h luciferase activity was measured. The data shows averaged fusion activity

1040 normalized to empty vector transfected effector cells, error bars represent the standard  
1041 deviations of one representative experiment performed in triplicates.

1042 **F** Representative GFP fluorescence microscopy images of a cell-cell fusion assay with ACE2 and  
1043 ACE2/TMPRSS2 expressing target cells and effector cells expressing the indicated spike variants  
1044 (200  $\mu$ m scale bar).

1045 Statistical significance in **C** and **D** was determined by Two-Way ANOVA, p-values were corrected  
1046 for multiple comparisons by Sidak's method ( $p > 0.05$ , ns;  $p \leq 0.05$ , \*;  $p \leq 0.01$ , \*\*;  $p \leq 0.001$ , \*\*\*;  
1047  $p \leq 0.0001$ , \*\*\*\*).

1048

1049 **Figure 2: SARS2-S-mediated cell-cell fusion depends on ACE2 receptor expression whereas**  
1050 **SARS1-S-mediated fusion depends on TMPRSS2 activity in 293T cells.**

1051 **A** Cell-cell fusion assay. Effector cells (293T transfected with either empty vector or expression  
1052 plasmids for the indicated spike variants and Vp16-Gal4 transactivator) were co-cultured  
1053 together with target cells (293T transfected with ACE2 or TMPRSS2 expression plasmids at the  
1054 indicated ratios and Gal4-TurboGFP-Luc reporter plasmid). After 24h luciferase activity was  
1055 measured. The data shows averaged relative luminescence units, error bars represent the  
1056 standard deviations of one representative experiment performed in triplicates. Comparisons  
1057 were made against the condition with maximum activation using Two-Way ANOVA, p-values  
1058 were corrected for multiple comparisons by Sidak's method ( $p > 0.05$ , ns;  $p \leq 0.05$ , \*;  $p \leq 0.01$ , \*\*;  
1059  $p \leq 0.001$ , \*\*\*;  $p \leq 0.0001$ , \*\*\*\*).

1060 **B** The expression of proteins in target cells and effector cells after co-cultivation was analyzed  
1061 by Western blot from lysates harvested for determination of luciferase activity in **A**. The  
1062 unprocessed spike (S0) and the S1/S2-site processed spike (S2) are indicated by arrows. An



1063 additional cleavage product marked with an asterisk was observed. The predominant, processed  
1064 low molecular weight TMPRSS2 fragment is shown. The expression of GAPDH served as loading  
1065 control. One representative Western blot is shown.

1066

1067

1068 **Figure 3: SARS2-S mediated cell-cell fusion of 293T cells is enhanced by Bromhexine in the**  
1069 **presence of TMPRSS2.**

1070 **A** Cell-cell fusion assay. Effector cells (293T transfected with either empty vector or expression  
1071 plasmids for the indicated spike variants together with Vp16-Gal4 expression plasmid) were  
1072 added to target cells (293T transfected with empty vector, expression plasmids for ACE2,  
1073 TMPRSS2 alone or in combination and Gal4-TurboGFP-Luc reporter plasmid), which had been  
1074 pre-incubated for 30 min with Bromhexine, Ambroxol or Camostat. After addition of effector  
1075 cells, effector and target cells were co-cultured in the presence of the respective inhibitors at  
1076 50 $\mu$ M. After 24h luciferase activity was measured. The data shows averaged relative  
1077 luminescence units and the error bars represent the standard error of the mean of four  
1078 independent experiments, each performed in triplicates. Statistical significance was determined  
1079 by Two-Way ANOVA, p-values were corrected for multiple comparisons by Sidak's method  
1080 ( $p > 0.05$ , ns;  $p \leq 0.05$ , \*;  $p \leq 0.01$ , \*\*;  $p \leq 0.001$ , \*\*\*;  $p \leq 0.0001$ , \*\*\*\*). For the comparison between  
1081 inhibitor treatments, the three comparisons within each family were corrected for. The p-values  
1082 for comparisons between different H<sub>2</sub>O (control) treated target cell populations were corrected  
1083 for multiple comparison of each target cell and effector cell combination in the inhibitor group  
1084 (in total 190 possible comparisons).

1085 **B** The expression of proteins in treated target cells and effector cells after co-cultivation was  
1086 analyzed by Western blot from lysates harvested for determination of luciferase activity shown  
1087 in **A**. The unprocessed spike (S0) and the S1/S2-site processed (S2) spike are indicated by  
1088 arrows. An additional cleavage product marked with an asterisk was observed. The  
1089 predominant, processed low molecular weight TMPRSS2 fragment is shown. The expression of  
1090 GAPDH served as loading control. One representative Western blot is shown. ev = empty vector.

1091 **C** Cell-cell fusion assay. Effector cells (293T cells transfected with the indicated glycoprotein  
1092 expression plasmids and Gal4-Luc reporter plasmid) were co-cultured with target cells (293T  
1093 transfected with ACE2 and TMPRSS2 expression plasmids and Vp16-Gal4 expression plasmid)  
1094 that were pre-incubated for 30 min with Bromhexine or Ambroxol. After addition of effector  
1095 cells, effector und target cells were co-cultured with inhibitors at indicated concentrations, and  
1096 luciferase activity of cell lysates was measured after 48h. Data shows averaged relative  
1097 luminescence units of one experiment performed in triplicates, error bars represent the  
1098 standard deviation.

1099

1100 **Figure 4: Sensitivity of SARS2-S-mediated 293T cell-cell fusion to different inhibitors.**

1101 **A** Cell-cell fusion assay. Effector cells (293T transfected with expression plasmids for the  
1102 indicated spike variants together with Vp16-Gal4 expression plasmid) were added to target cells  
1103 (293T transfected with expression plasmids for ACE2 and Gal4-TurboGFP-Luc reporter plasmid),  
1104 which had been pre-incubated for 30 min with twice the final concentration of AEBSF (200 $\mu$ M),  
1105 furin inhibitor CMK (10 $\mu$ M), proteinase inhibitor cocktail, EDTA/EGTA (2.5mM each),  
1106 Bromhexine (50 $\mu$ M), Ambroxol (50 $\mu$ M) and Camostat (50 $\mu$ M). After addition of effector cells,  
1107 effector und target cells were co-cultured in the presence of the respective inhibitors. After 24h



1108 luciferase activity was measured. The data shows values normalized to solvent treatment which  
1109 was set to 100% and the error bars represent the standard deviation of three independent  
1110 experiments, each performed in triplicates.

1111 **B** Cell-cell-fusion assay as shown in **A**, except that effector cells were pre-incubated with  
1112 indicated inhibitors for 18h before co-culture with target cells. The target cells were pre-  
1113 incubated with indicated inhibitors for 30min before addition of effector cells. After 24h  
1114 luciferase activity was measured. The data shows values normalized to solvent treatment which  
1115 was set to 100% and the error bars represent the standard deviation of three independent  
1116 experiments, each performed in triplicates.

1117 **C** 293T cells transfected with Vp16-Gal4 and Gal4-TurboGFP-Luc reporter expression plasmids  
1118 and were incubated with inhibitors as described in **A**. After 24h luciferase activity was  
1119 measured. The data shows values normalized to solvent treatment which was set to 100%, error  
1120 bars represent the standard deviations of one representative experiment performed in  
1121 triplicates.

1122 **D** The expression of proteins in treated target cells and effector cells after co-cultivation was  
1123 analyzed by Western blot from lysates harvested for determination of luciferase activity shown  
1124 in **A**. The unprocessed spike (S0) and the S1/S2-site processed (S2) spike are indicated by  
1125 arrows. An additional cleavage product marked with an asterisk was observed. The  
1126 predominant, processed low molecular weight TMPRSS2 fragment is shown. The expression of  
1127 GAPDH served as loading control. One representative Western blot is shown.

1128

1129 **Figure 5: The matrix metalloproteinase inhibitor Batimastat inhibits SARS2-S-mediated cell-**  
1130 **cell fusion.**

1131 **A** Cell-cell fusion assay: Effector cells (293T transfected with expression plasmids for the  
1132 indicated spike variants together with Vp16-Gal4 expression plasmid) were added to target cells  
1133 (293T transfected with expression plasmids for ACE2, ACE2/TMPRSS2, TMPRSS2 and Gal4-  
1134 TurboGFP-Luc reporter plasmid), which had been pre-incubated with Batimastat or Camostat  
1135 for 30 min at twice the indicated final concentration. After 24h luciferase activity was measured.  
1136 The data shows averaged relative luminescence units, error bars represent the standard  
1137 deviations of one representative experiment performed in triplicates.

1138 **B** The expression of proteins in treated target cells and effector cells after co-cultivation was  
1139 analyzed by Western blot from lysates harvested for determination of luciferase activity shown  
1140 in **A**. The unprocessed Spike (S0) and the S1/S2-site processed (S2) spike are indicated by  
1141 arrows. An additional cleavage product marked with an asterisk was observed. The  
1142 predominant, processed low molecular weight TMPRSS2 fragment is shown. The expression of  
1143 GAPDH served as loading control. One representative Western blot is shown. ev = empty vector.

1144 **C** Cell-cell fusion assay. Effector cells (293T transfected with expression plasmids for the  
1145 indicated spike variants together with Vp16-Gal4 expression plasmid) were added to target cells  
1146 (293T transfected with expression plasmids for ACE2, ACE2/TMPRSS2, TMPRSS2 and Gal4-  
1147 TurboGFP-Luc reporter plasmid), which had been pre-incubated for 30 min with Batimastat  
1148 (10 $\mu$ M) and/or Camostat (50 $\mu$ M) at twice the final concentration. After 24h luciferase activity  
1149 was measured. The data shows values normalized to solvent treatment which was set to 100%  
1150 and the error bars represent the standard deviation of three independent experiments, each  
1151 performed in triplicates. Statistical significance in **A** and **C** was determined by Two-Way ANOVA,  
1152 p-values were corrected for multiple comparisons by Sidak's method ( $p > 0.05$ , ns;  $p \leq 0.05$ , \*;  
1153  $p \leq 0.01$ , \*\*;  $p \leq 0.001$ , \*\*\*;  $p \leq 0.0001$ , \*\*\*\*).

1154

1155 **Figure 6: The conserved S2' site is the site of TMPRSS2-mediated activation of SARS2-S for cell-**  
1156 **cell fusion.**

1157 **A** Cell-cell fusion assay. Effector cells (293T transfected with expression plasmids for the  
1158 indicated spike variants together with Vp16-Gal4 expression plasmid) were added to target cells  
1159 (293T transfected with expression plasmids for ACE2, ACE2/TMPRSS2, TMPRSS2 and Gal4-  
1160 TurboGFP-Luc reporter plasmid). After 24h luciferase activity was measured. The data shows  
1161 values fold empty vector control and the error bars represent the standard deviation of three  
1162 independent experiments, each performed in triplicates.

1163 **B** Expression of analyzed spike variants in 293T cells. The unprocessed spike (S0) and the S1/S2-  
1164 site processed spike (S2) are indicated by arrows. The expression of GAPDH served as loading  
1165 control.

1166 **C** Cell surface expression and ACE binding. Cell surface expression and binding of soluble ACE2-  
1167 Fc by the indicated spike variants was determined by flow cytometry. Analysis was performed as  
1168 in Fig. 1 C.

1169 **D** Cell-cell fusion assay. Effector cells (293T transfected with expression plasmids for the  
1170 indicated spike variants together with Vp16-Gal4 expression plasmid) were pre-incubated with  
1171 furin inhibitor CMK (10 $\mu$ M) and after 16h added to target cells (293T transfected with  
1172 expression plasmids for ACE2 and Gal4-TurboGFP-Luc reporter plasmid), which had been pre-  
1173 incubated for 30 min with the same inhibitor concentration. After addition of effector cells,  
1174 effector und target cells were co-cultured in the presence of CMK. After 24h luciferase activity  
1175 was measured. The data shows values normalized to solvent treatment which was set to 100%

1176 and the error bars represent the standard deviation of two independent experiments, each  
1177 performed in triplicates.

1178 **E** Cell-cell fusion assay. Effector cells (293T transfected with expression plasmids for the  
1179 indicated spike variants together with Vp16-Gal4 expression plasmid) were added to target cells  
1180 (293T transfected with expression plasmids for ACE2, ACE2/TMPRSS2, TMPRSS2 and Gal4-  
1181 TurboGFP-Luc reporter plasmid), which had been pre-incubated with Batimastat and/or  
1182 Camostat for 30 min at twice the final concentration; final concentrations were Batimastat  
1183 10 $\mu$ M and/or Camostat 50 $\mu$ M. After 24h luciferase activity was measured. The data shows  
1184 values normalized to solvent treatment which was set to 100% and the error bars represent the  
1185 standard deviation of two independent experiments, each performed in triplicates.

1186 Statistical significance in **A**, **C**, **D** and **E** was determined by Two-Way ANOVA, p-values were  
1187 corrected for multiple comparisons by Sidak's method ( $p > 0.05$ , ns;  $p \leq 0.05$ , \*;  $p \leq 0.01$ , \*\*;  
1188  $p \leq 0.001$ , \*\*\*;  $p \leq 0.0001$ , \*\*\*\*).

1189

1190 **Figure 7: Requirements for the entry of SARS2-S pseudotyped lentiviral particles differ from**  
1191 **requirements for SARS2-S-mediated cell-cell fusion.**

1192 **A** 293T cells transfected with empty vector, ACE2/TMPRSS2, ACE2 or TMPRSS2 were pre-  
1193 incubated with Bromhexine, Ambroxol or Camostat at the indicated concentration before  
1194 addition of lentiviral particles pseudotyped with SARS2-S. 48h after transduction the cells were  
1195 analyzed via flow-cytometry. Data shows averaged percent of GFP-positive cells, error bars  
1196 represent the standard deviations of one representative experiment performed in triplicates.

1197 **B** Micrographs of ACE2 and TMPRSS2 transfected cells that were infected with the respective  
1198 lentiviral GFP-encoding pseudotype particles.

1199 **C** 293T cells transfected with ACE2/TMPRSS2 were pre-incubated with Batimastat (10 $\mu$ M),  
1200 Bromhexine (50 $\mu$ M), Ambroxol (50 $\mu$ M), AEBSF (200 $\mu$ M), Camostat (50 $\mu$ M) or Batimastat  
1201 (10 $\mu$ M) in combination with Camostat (50 $\mu$ M) before addition of lentiviral particles  
1202 pseudotyped with respective glycoprotein. 48h after transduction the cells were lysed and  
1203 luciferase activity was determined. Data shows fold change over background (bald particles with  
1204 solvent control), error bars represent the standard deviations of three independent  
1205 experiments, each performed in triplicates, raw values were log<sub>10</sub>-transformed before analysis.  
1206 **D** Western Blot analysis of incorporation of the respective spike variants into lentiviral particles  
1207 used in **E** and lysate control of transfected 293T cells used for production of lentiviral particles.  
1208 p24 and GAPDH served as loading control.  
1209 **E** 293T cells transfected with ACE2/TMPRSS2 were pre-incubated with Batimastat (10 $\mu$ M), E64-d  
1210 (25 $\mu$ M), Camostat (50 $\mu$ M) or Batimastat (10 $\mu$ M)/ E64-d (10 $\mu$ M) in combination with Camostat  
1211 (50 $\mu$ M) before addition of lentiviral particles pseudotyped with the respective glycoproteins.  
1212 48h after transduction the cells were lysed and luciferase activity was determined. Data shows  
1213 fold change over background (bald particles with solvent control), error bars represent the  
1214 standard deviations of two independent experiments, each performed in triplicates, raw values  
1215 were log<sub>10</sub>-transformed before analysis. Statistical significance in **A**, **C** and **E** was determined by  
1216 Two-Way ANOVA, p-values were corrected for multiple comparisons by Sidak's method method  
1217 ( $p > 0.05$ , ns;  $p \leq 0.05$ , \*;  $p \leq 0.01$ , \*\*;  $p \leq 0.001$ , \*\*\*;  $p \leq 0.0001$ , \*\*\*\*).

1218  
1219 **Figure 8: SARS-CoV-2 is weakly inhibited by Bromhexine and Ambroxol on Calu-3 cells.**  
1220 **A** RT-qPCR analysis of TMPRSS2 expression. Fold TMPRSS2 mRNA expression in Calu-3 cells,  
1221 293T cells, and A549 cells was measured by RT-qPCR using the  $\Delta\Delta C_t$  method. The -RT control for

1222 the GAPDH mRNA was not negative as expected but the contamination was considered  
1223 irrelevant as its Ct was more than 19 cycles over the value of the sample, representing a  
1224 contamination of less than 0.01%. Error bars represent the upper error bound calculated from  
1225 the sum of the SDs of the  $\Delta$ Ct values for each cell line.

1226 **B** Calu-3 cells were infected with lentiviral particles encoding a TurboGFP-luciferase reporter  
1227 gene pseudotyped with SARS2-S in the presence of 50 $\mu$ M Bromhexine, Ambroxol or Camostat.  
1228 48h after transduction the cells were lysed and luciferase activity was determined. The data  
1229 shows values normalized to solvent treatment, which was set to 100%, and the error bars  
1230 represent the standard deviation of three independent experiments, each performed in  
1231 triplicates.

1232 **C** Viral RNA load. Calu-3 cells were infected with SARS-CoV-2 in the presence of Bromhexine,  
1233 Ambroxol, Camostat, or Batimastat at the indicated concentrations. Viral RNA was quantified by  
1234 RT-qPCR 24h (experiment 1 and 2) and 20h (experiment 3) post infection. The median Ct values  
1235 of three experiments (each experiment was performed in biological triplicates) are plotted  
1236 (experiment 1: dots, experiment 2: triangles, experiment 3: squares), and the mean was  
1237 determined. Significant differences to solvent controls are indicated by asterisks. Significance  
1238 was determined using repeated measures one way ANOVA and Fisher's LSD without correcting  
1239 for multiple comparisons. Differences were also significant using two way ANOVA without  
1240 correction for multiple comparisons and all available data, but use of the median from each  
1241 experiment reduced variance. All samples were compared to water except for Batimastat, which  
1242 was compared to DMSO.

1243 **D** Relative viral RNA expression. Using the median Ct values from each experiment series as  
1244 above and the experimentally determined PCR efficiency, the amount of viral RNA was  
1245 calculated as percent of solvent control for each inhibitor.

1246 **E** Cell viability. Cell viability of Calu-3 was determined after culture in the presence of the  
1247 indicated compounds in two independent assays, each performed in biological triplicates.

1248 Statistical significance was determined using Two-Way ANOVA.

1249

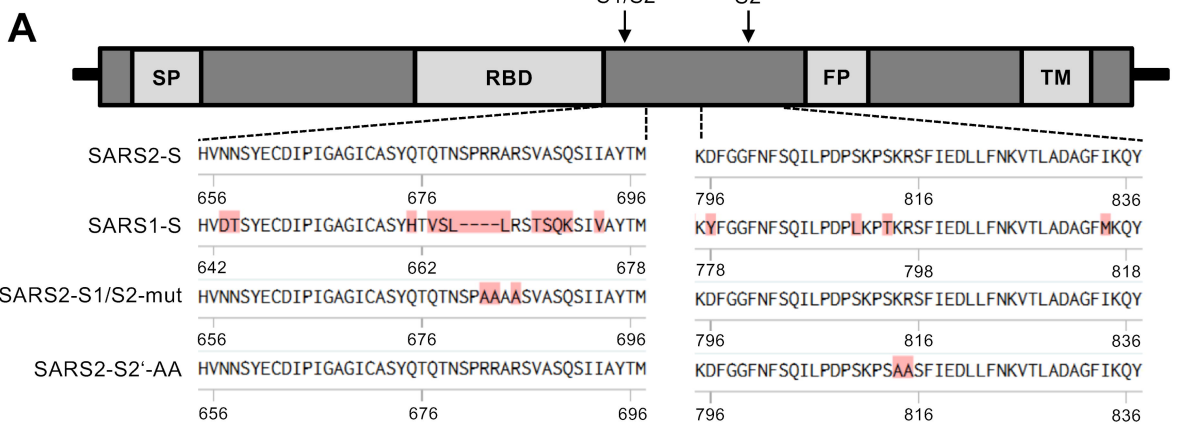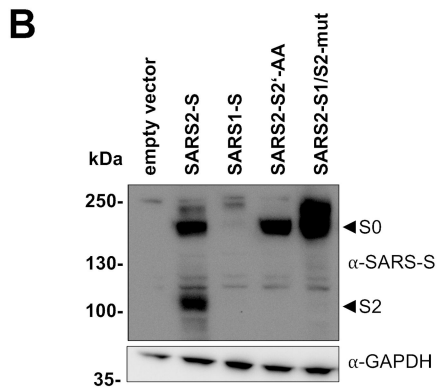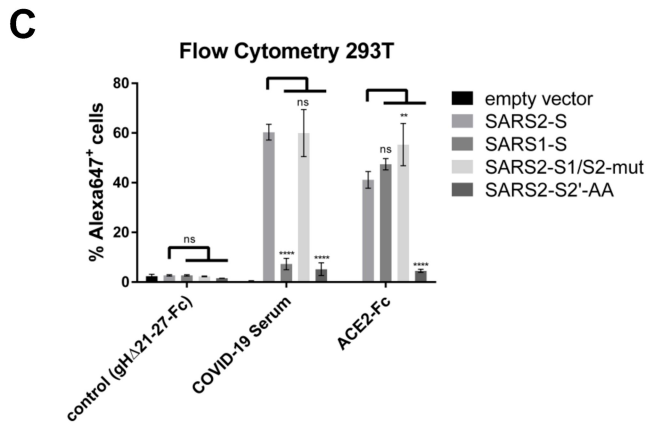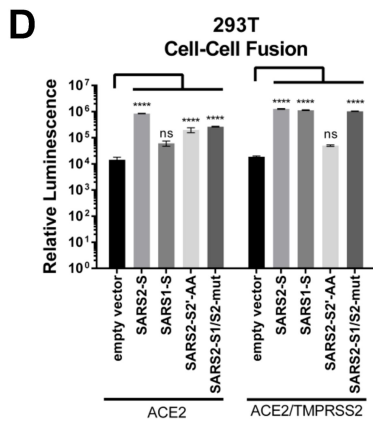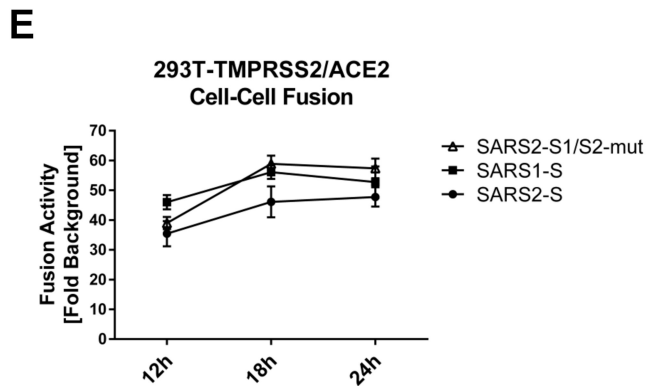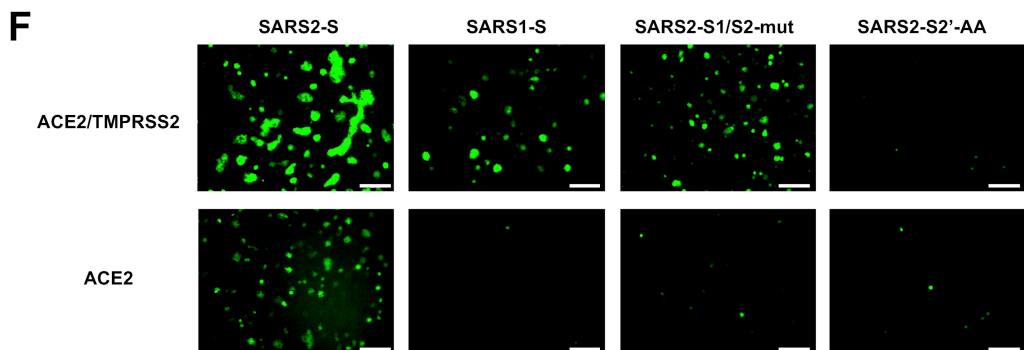



**A**

## 293T Cell-Cell Fusion

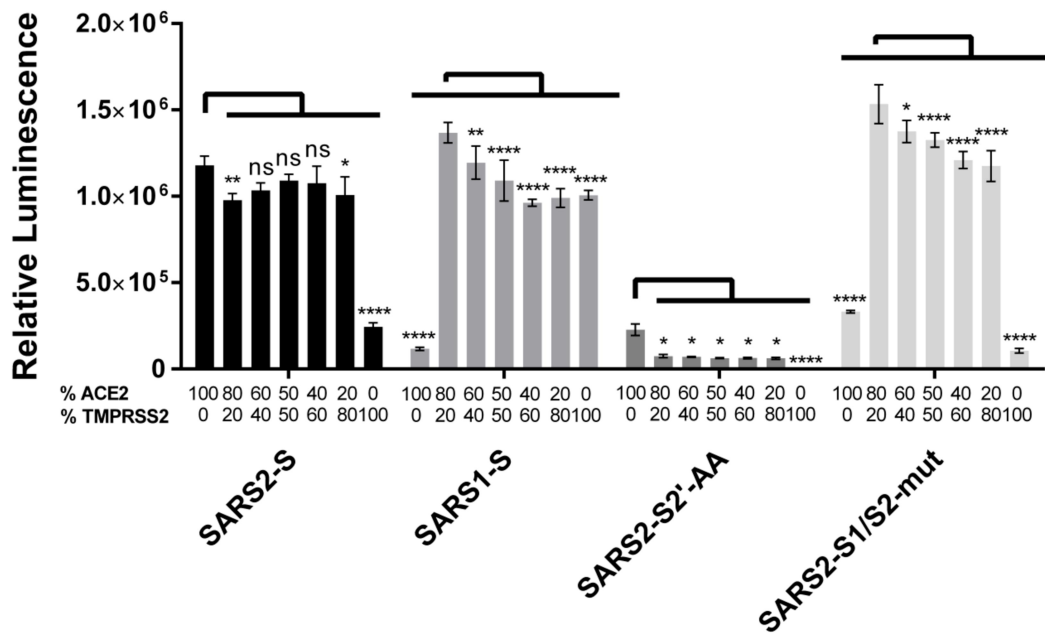**B**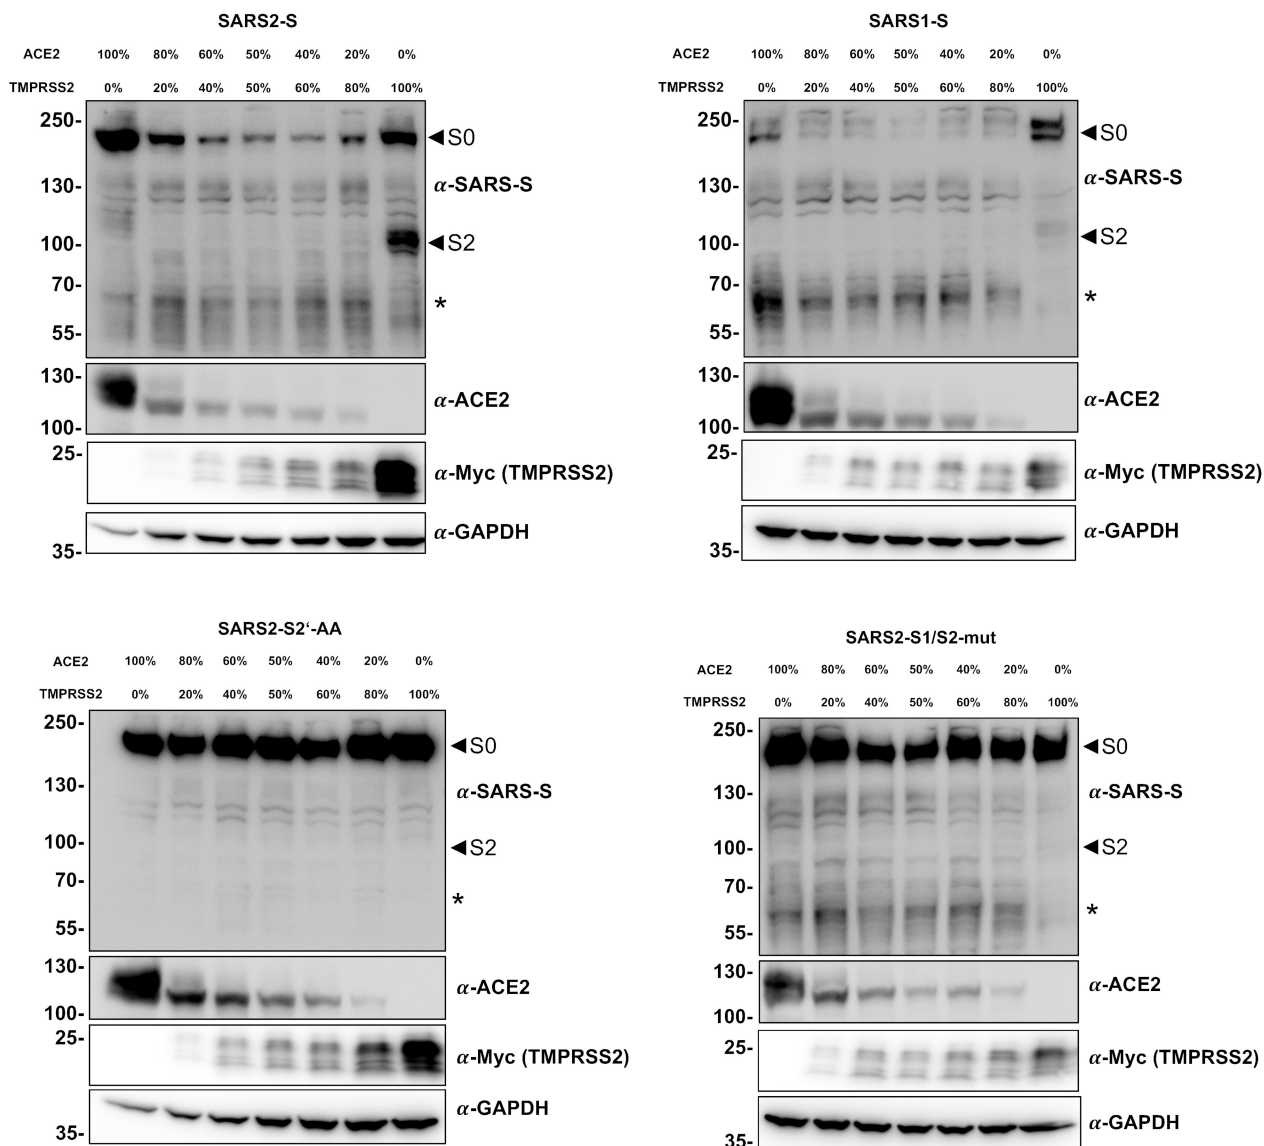

**A**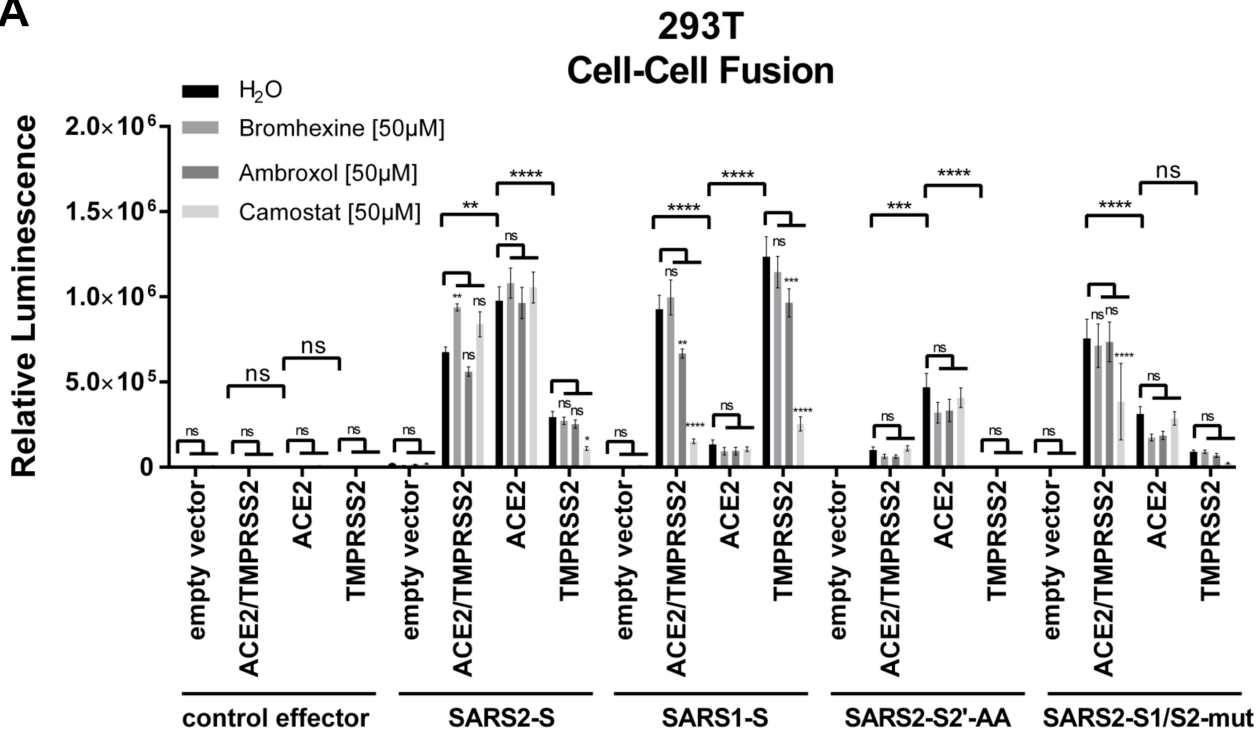**B**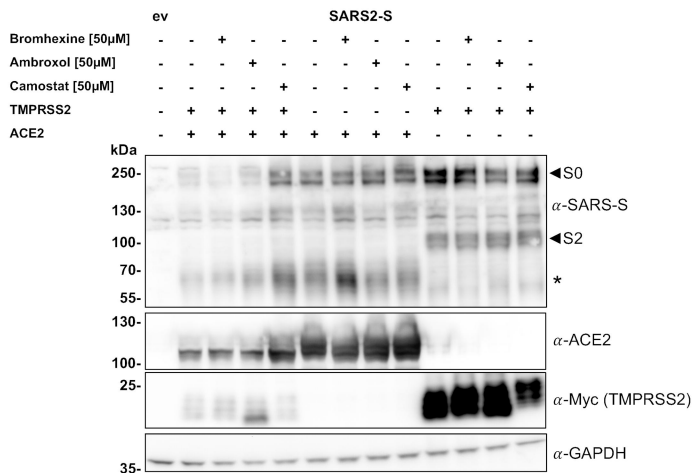**C**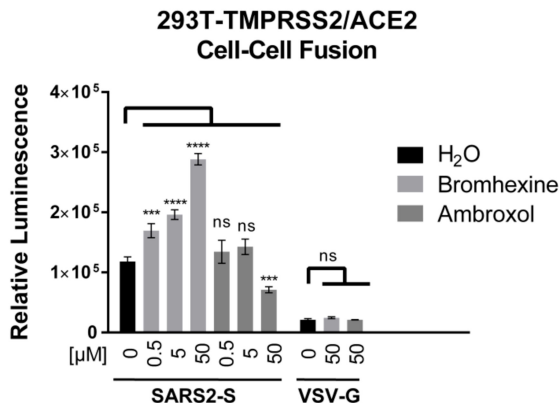



**A**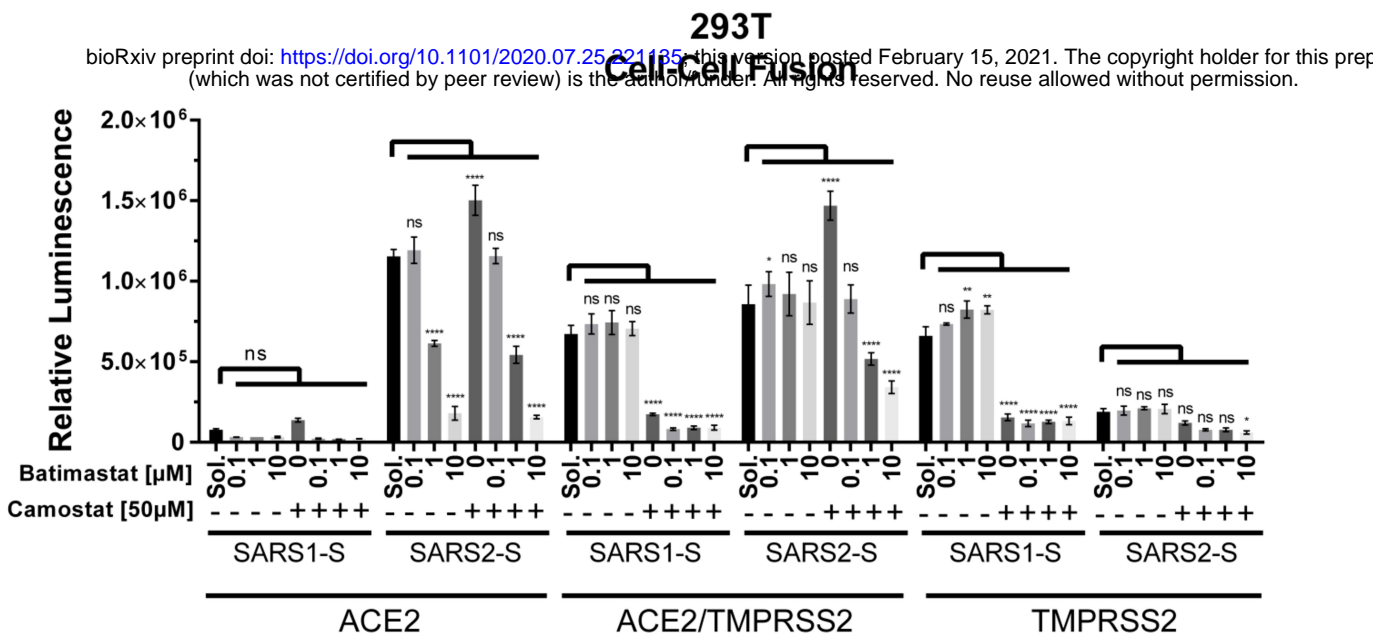**B**

Effector: ev | SARS2-S  
Target: ev | ACE2 | ACE2/TMPRSS2 | TMPRSS2

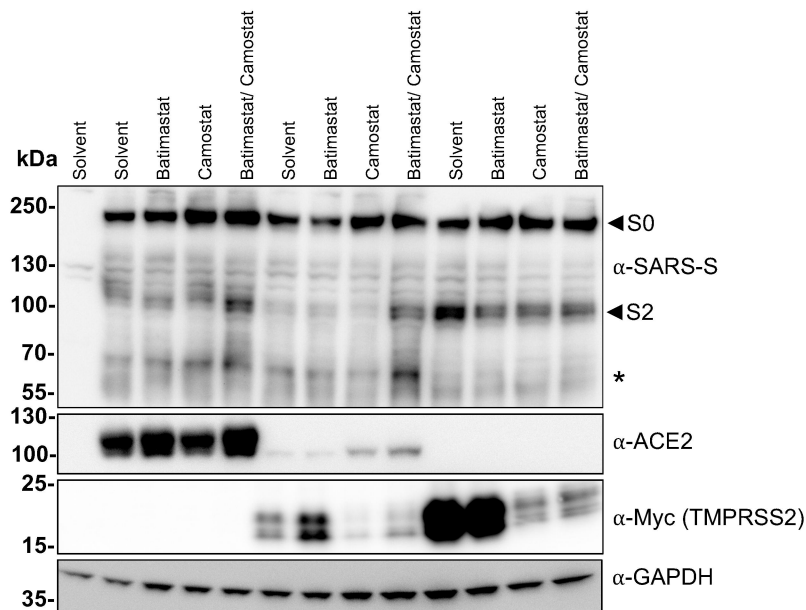**C**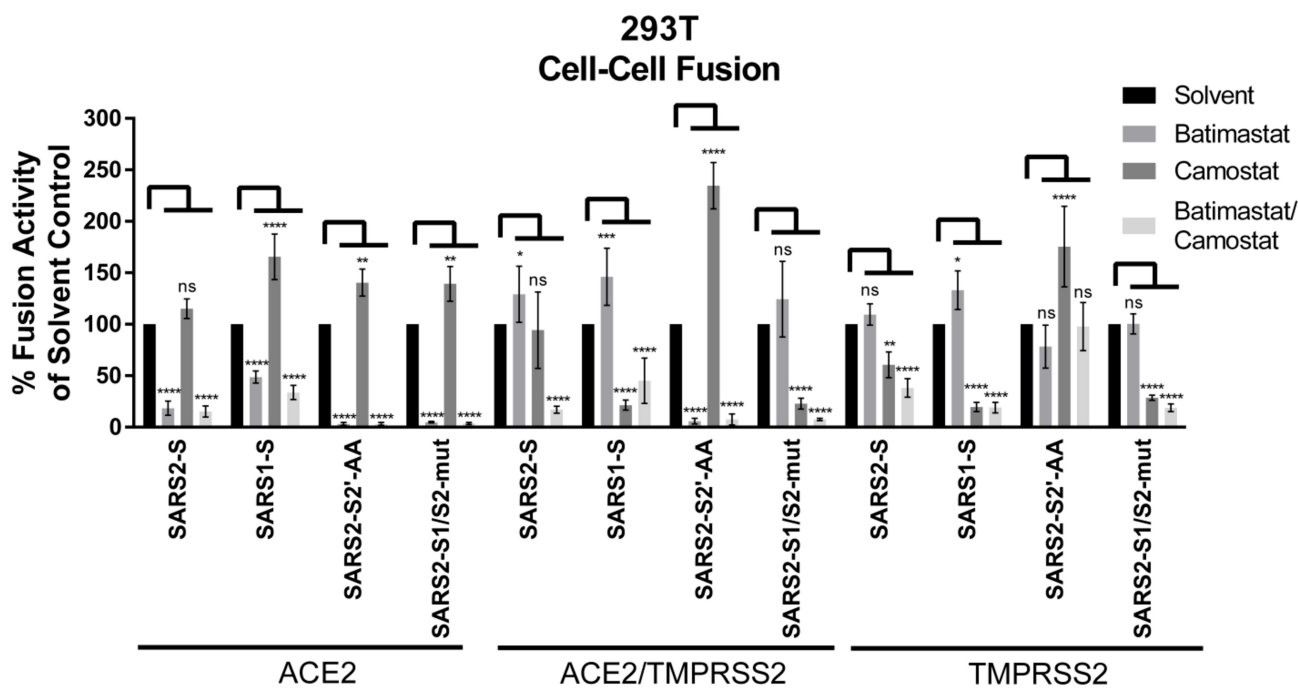

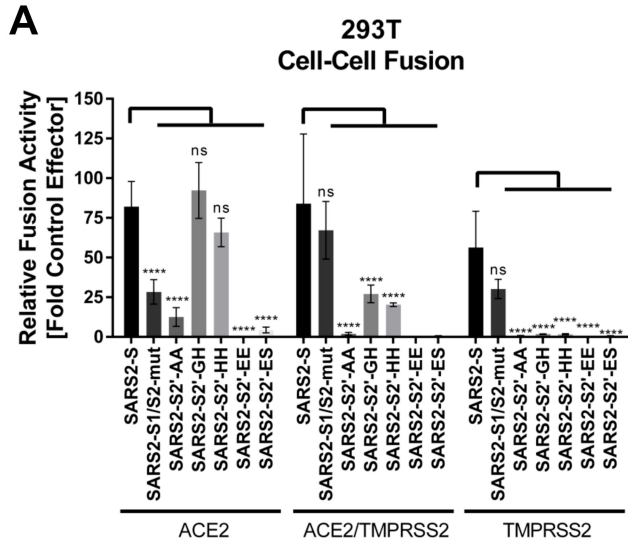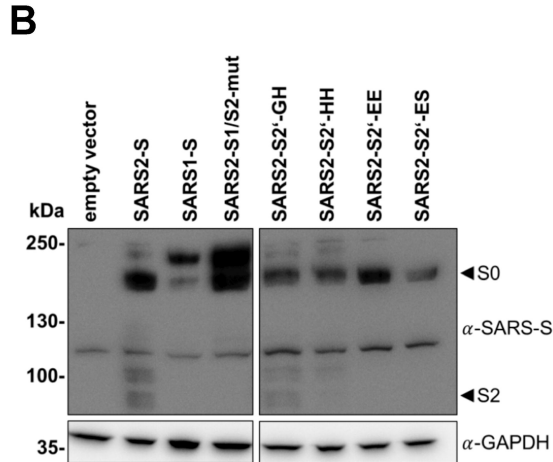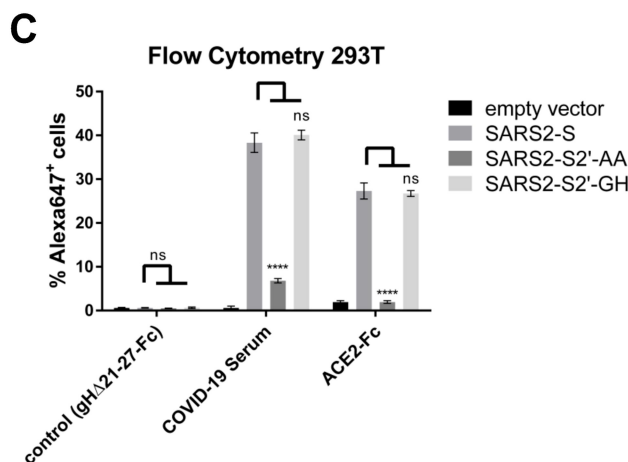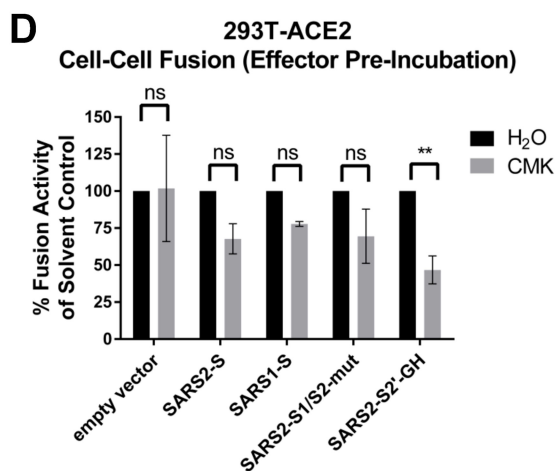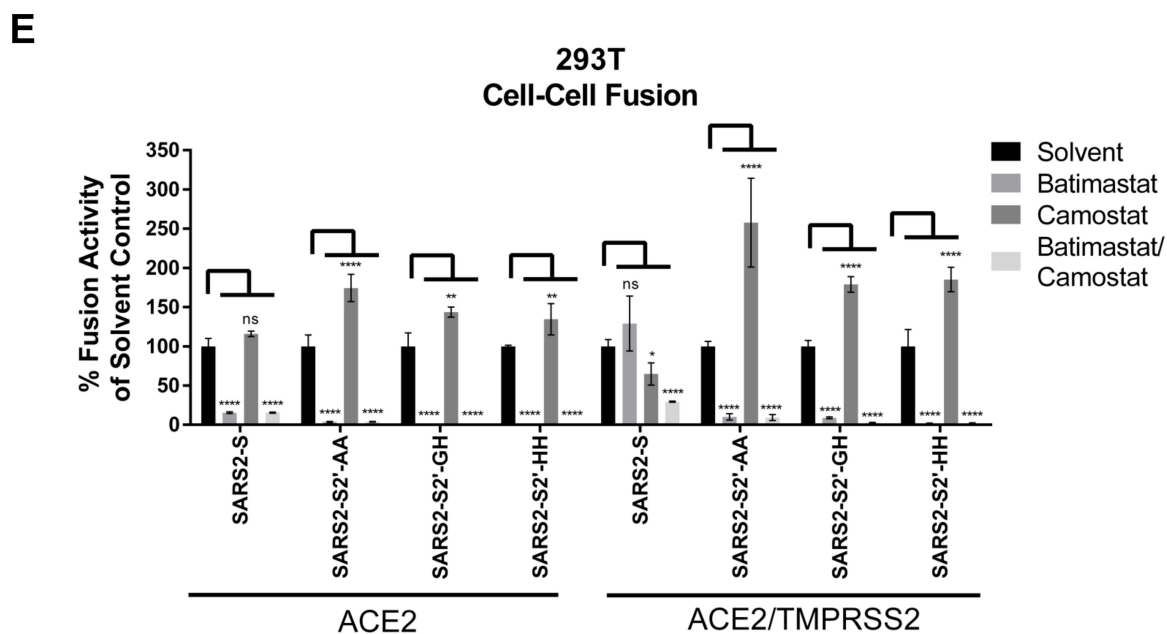

**A**

293T

## SARS2-S Pseudotype Entry

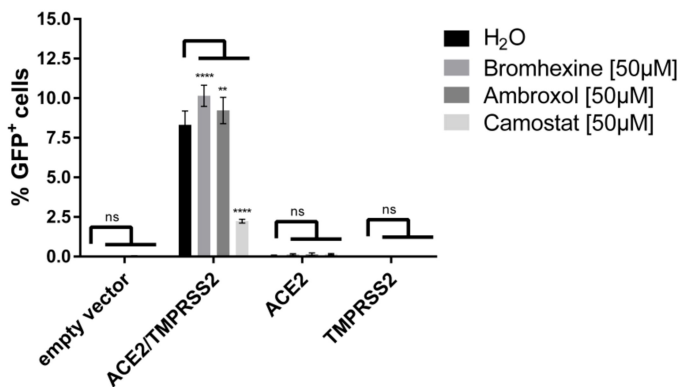**B**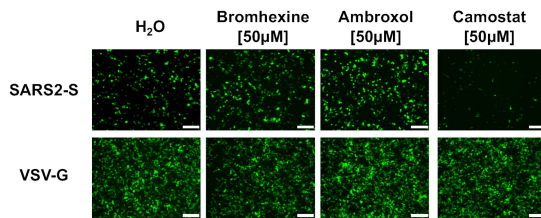**C**

## 293T-ACE2/TMPRSS2 Pseudotype Entry

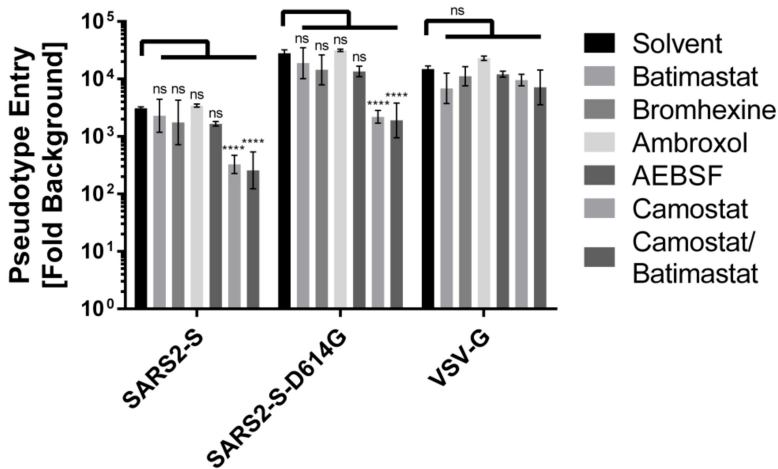**D**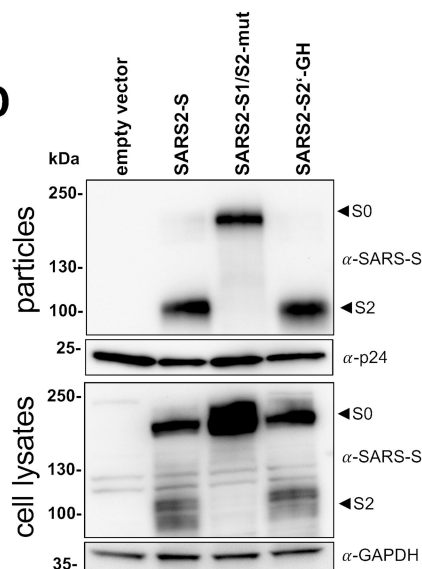**E**

## 293T-ACE2/TMPRSS2 Pseudotype Entry

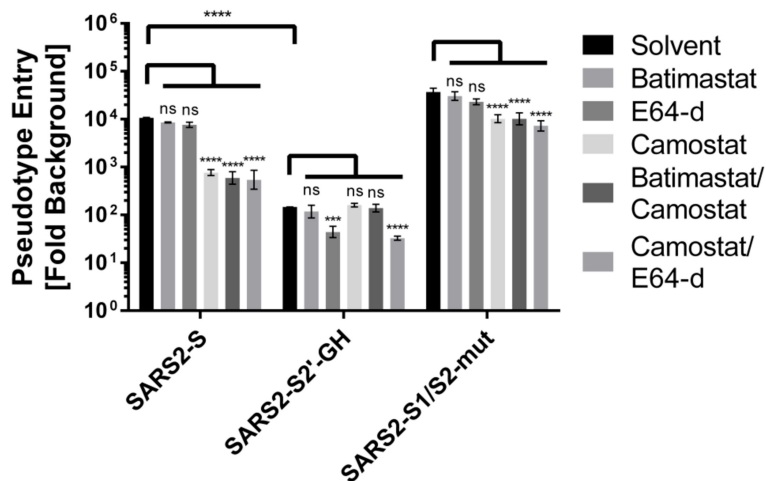



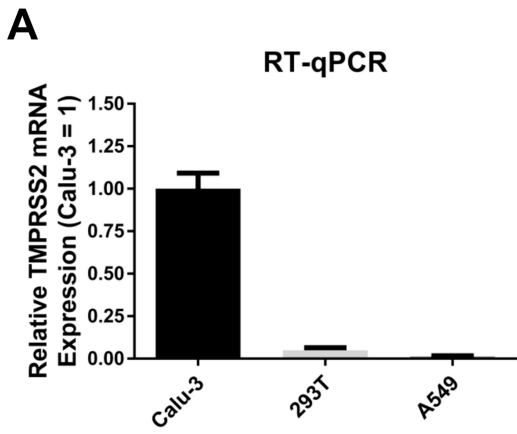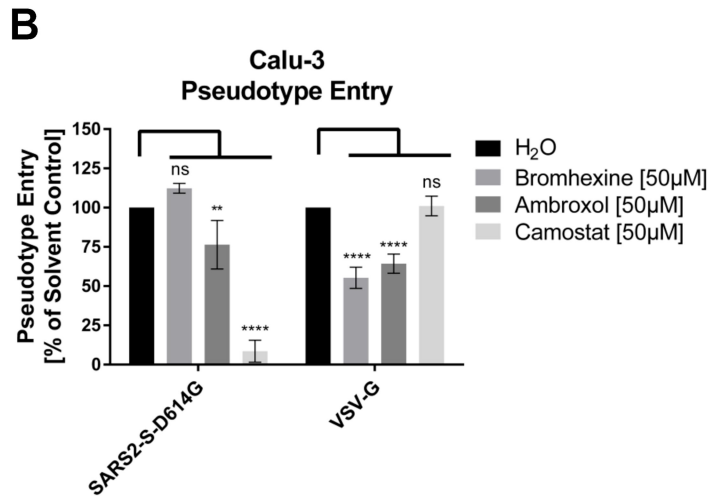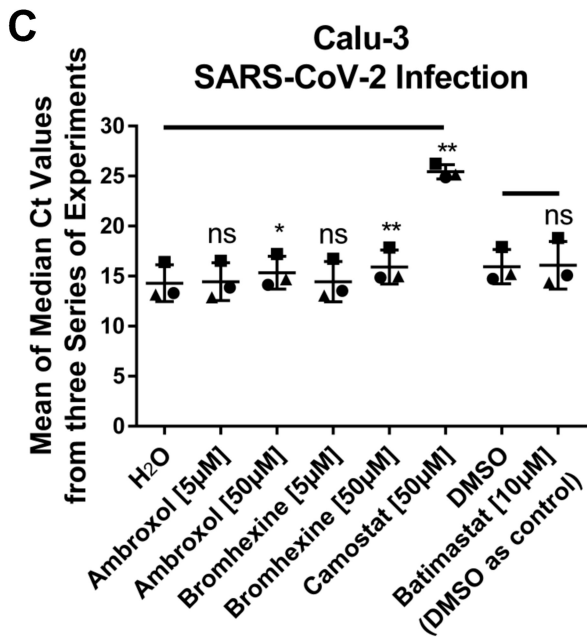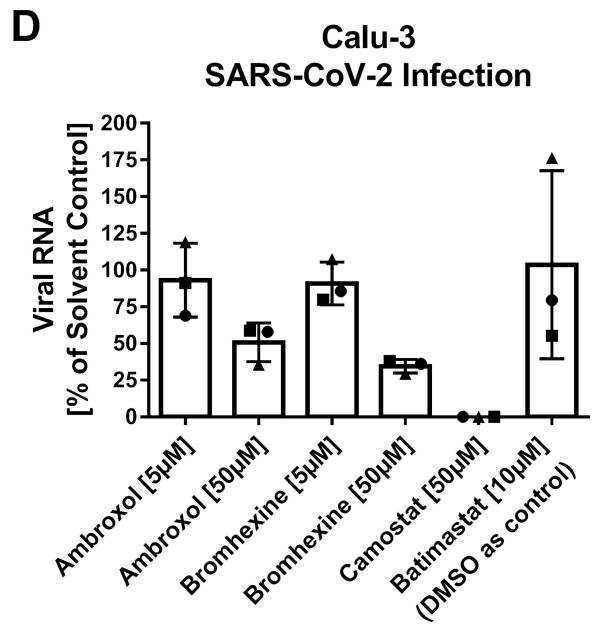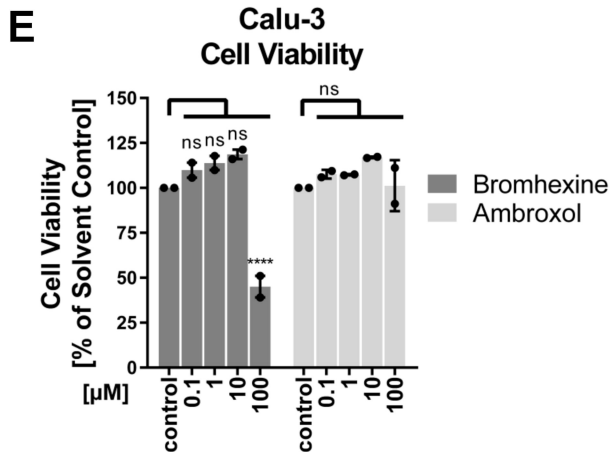

Source: https://www.biorxiv.org/content/10.1101/2020.07.25.221135v4.full.pdf
